# Supplementary material
Source: publisher figshare collection journal article supplement (https://acs.figshare.com/ndownloader/files/12814781)
Supplement: Supplementary file 1 [file 12814781]

## Sheet: Table S6 Notes
Table S6 contains tabs for unique MapMan Pathway Bins enriched for genes that were significantly down-regulated by DECe treatment relative to Air Controls. The DECe Unique Enriched Bins tab shows stats from Wilcoxon Rank Sum tests (P ≤ 0.05) with Benjamini & Hochberg multiple testing correction (FDR ≤ 0.05). There are also 3 individual tabs for enriched Bins, and these include specific Bin Codes,…

## Sheet: DECe Unique Enriched Bins
Unique Bins Enriched for DECe Down-Regulated Transcripts
Bin	Name	Transcript Counts (excluding co-assignments)	Corrected P-value
27.3	RNA regulation of transcription	202	0.038194
29.5	protein degradation	93	0.0313549
11	lipid metabolism	42	0.0305509

## Sheet: Bin 27.3 RNA Reg
Bin Code	Bin Name	Sequence Name	Description from Mercator Mapping
27.3.1	RNA.regulation of transcription.ABI3/VP1-related B3-domain-containing transcription factor family	psme_t044390	(at3g61970 : 80.1) NGATHA2 (NGA2); CONTAINS InterPro DOMAIN/s: Transcriptional factor B3 (InterPro:IPR003340); BEST Arabidopsis thaliana protein match is: AP2/B3-like transcriptional factor family protein (TAIR:AT2G46870.1); Has 1373 Blast hits to 1371 proteins in 72 species: Archae - 0; Bacteria - 0; Metazoa - 0; Fungi - 0; Plants - 1373; Viruses - 0; Other Eukaryotes - 0 (source: NCBI BLink). &…
27.3.3	RNA.regulation of transcription.AP2/EREBP, APETALA2/Ethylene-responsive element binding protein family	psme_t004753	(at4g23750 : 92.4) encodes a member of the ERF (ethylene response factor) subfamily B-5 of ERF/AP2 transcription factor family. The protein contains one AP2 domain. There are 7 members in this subfamily. Monopteros target gene.; cytokinin response factor 2 (CRF2); CONTAINS InterPro DOMAIN/s: DNA-binding, integrase-type (InterPro:IPR016177), Pathogenesis-related transcriptional factor/ERF, DNA-bin…
27.3.3	RNA.regulation of transcription.AP2/EREBP, APETALA2/Ethylene-responsive element binding protein family	psme_t013213	(at5g61890 : 94.7) encodes a member of the ERF (ethylene response factor) subfamily B-4 of ERF/AP2 transcription factor family. The protein contains one AP2 domain. There are 7 members in this subfamily.; Integrase-type DNA-binding superfamily protein; CONTAINS InterPro DOMAIN/s: DNA-binding, integrase-type (InterPro:IPR016177), Pathogenesis-related transcriptional factor/ERF, DNA-binding (InterP…
27.3.3	RNA.regulation of transcription.AP2/EREBP, APETALA2/Ethylene-responsive element binding protein family	psme_t022108	(ipr021924 : 289.3838) Protein of unknown function DUF3537 & (at1g50630 : 253.0) Protein of unknown function (DUF3537); CONTAINS InterPro DOMAIN/s: Protein of unknown function DUF3537 (InterPro:IPR021924); BEST Arabidopsis thaliana protein match is: Protein of unknown function (DUF3537) (TAIR:AT3G20300.1); Has 35333 Blast hits to 34131 proteins in 2444 species: Archae - 798; Bacteria - 22429; Met…
27.3.3	RNA.regulation of transcription.AP2/EREBP, APETALA2/Ethylene-responsive element binding protein family	psme_t024171	(loc_os01g49830.1 : 252.0) no description available & (at1g68840 : 242.0) Rav2 is part of a complex that has been named `regulator of the (H+)-ATPase of the vacuolar and endosomal membranes' (RAVE); related to ABI3/VP1 2 (RAV2); FUNCTIONS IN: transcription repressor activity, DNA binding, sequence-specific DNA binding transcription factor activity; INVOLVED IN: regulation of transcription, DNA-de…
27.3.3	RNA.regulation of transcription.AP2/EREBP, APETALA2/Ethylene-responsive element binding protein family	psme_t028568	(at5g21960 : 90.1) encodes a member of the DREB subfamily A-5 of ERF/AP2 transcription factor family. The protein contains one AP2 domain. There are 15 members in this subfamily including RAP2.1, RAP2.9 and RAP2.10.; Integrase-type DNA-binding superfamily protein; FUNCTIONS IN: DNA binding, sequence-specific DNA binding transcription factor activity; INVOLVED IN: regulation of transcription, DNA-…
27.3.3	RNA.regulation of transcription.AP2/EREBP, APETALA2/Ethylene-responsive element binding protein family	psme_t037805	(at5g21960 : 117.0) encodes a member of the DREB subfamily A-5 of ERF/AP2 transcription factor family. The protein contains one AP2 domain. There are 15 members in this subfamily including RAP2.1, RAP2.9 and RAP2.10.; Integrase-type DNA-binding superfamily protein; FUNCTIONS IN: DNA binding, sequence-specific DNA binding transcription factor activity; INVOLVED IN: regulation of transcription, DNA…
27.3.3	RNA.regulation of transcription.AP2/EREBP, APETALA2/Ethylene-responsive element binding protein family	psme_t038865	(loc_os01g58420.1 : 87.4) no description available & (at1g28360 : 87.0) encodes a member of the ERF (ethylene response factor) subfamily B-1 of ERF/AP2 transcription factor family (ERF12). The protein contains one AP2 domain. There are 15 members in this subfamily including ATERF-3, ATERF-4, ATERF-7, and leafy petiole.; ERF domain protein 12 (ERF12); CONTAINS InterPro DOMAIN/s: DNA-binding, integ…
27.3.3	RNA.regulation of transcription.AP2/EREBP, APETALA2/Ethylene-responsive element binding protein family	psme_t040588	(q9sxs8|erf3_tobac : 89.4) Ethylene-responsive transcription factor 3 (Ethylene-responsive element-binding factor 3 homolog) (EREBP-5) (NtERF5) - Nicotiana tabacum (Common tobacco) & (at1g28360 : 84.0) encodes a member of the ERF (ethylene response factor) subfamily B-1 of ERF/AP2 transcription factor family (ERF12). The protein contains one AP2 domain. There are 15 members in this subfamily incl…
27.3.3	RNA.regulation of transcription.AP2/EREBP, APETALA2/Ethylene-responsive element binding protein family	psme_t042938	(at5g61600 : 114.0) encodes a member of the ERF (ethylene response factor) subfamily B-3 of ERF/AP2 transcription factor family. The protein contains one AP2 domain. There are 18 members in this subfamily including ATERF-1, ATERF-2, AND ATERF-5.; ethylene response factor 104 (ERF104); CONTAINS InterPro DOMAIN/s: DNA-binding, integrase-type (InterPro:IPR016177), Pathogenesis-related transcriptiona…
27.3.3	RNA.regulation of transcription.AP2/EREBP, APETALA2/Ethylene-responsive element binding protein family	psme_t046411	(loc_os04g46400.1 : 109.0) no description available & (at5g25810 : 106.0) encodes a member of the DREB subfamily A-4 of ERF/AP2 transcription factor family (TINY). The protein contains one AP2 domain. There are 17 members in this subfamily including TINY. Ectopic or overexpression of this gene in a Ds tagged line has reduced cell expansion. The expression of this gene is induced by ethylene and l…
27.3.3	RNA.regulation of transcription.AP2/EREBP, APETALA2/Ethylene-responsive element binding protein family	psme_t052749	(at1g19210 : 118.0) encodes a member of the DREB subfamily A-5 of ERF/AP2 transcription factor family. The protein contains one AP2 domain. There are 15 members in this subfamily including RAP2.1, RAP2.9 and RAP2.10.; Integrase-type DNA-binding superfamily protein; FUNCTIONS IN: DNA binding, sequence-specific DNA binding transcription factor activity; INVOLVED IN: regulation of transcription, DNA…
27.3.3	RNA.regulation of transcription.AP2/EREBP, APETALA2/Ethylene-responsive element binding protein family	psme_t052848	(at1g19210 : 122.0) encodes a member of the DREB subfamily A-5 of ERF/AP2 transcription factor family. The protein contains one AP2 domain. There are 15 members in this subfamily including RAP2.1, RAP2.9 and RAP2.10.; Integrase-type DNA-binding superfamily protein; FUNCTIONS IN: DNA binding, sequence-specific DNA binding transcription factor activity; INVOLVED IN: regulation of transcription, DNA…
27.3.3	RNA.regulation of transcription.AP2/EREBP, APETALA2/Ethylene-responsive element binding protein family	psme_t053139	(at5g21960 : 120.0) encodes a member of the DREB subfamily A-5 of ERF/AP2 transcription factor family. The protein contains one AP2 domain. There are 15 members in this subfamily including RAP2.1, RAP2.9 and RAP2.10.; Integrase-type DNA-binding superfamily protein; FUNCTIONS IN: DNA binding, sequence-specific DNA binding transcription factor activity; INVOLVED IN: regulation of transcription, DNA…
27.3.3	RNA.regulation of transcription.AP2/EREBP, APETALA2/Ethylene-responsive element binding protein family	psme_t053189	(at5g21960 : 115.0) encodes a member of the DREB subfamily A-5 of ERF/AP2 transcription factor family. The protein contains one AP2 domain. There are 15 members in this subfamily including RAP2.1, RAP2.9 and RAP2.10.; Integrase-type DNA-binding superfamily protein; FUNCTIONS IN: DNA binding, sequence-specific DNA binding transcription factor activity; INVOLVED IN: regulation of transcription, DNA…
27.3.3	RNA.regulation of transcription.AP2/EREBP, APETALA2/Ethylene-responsive element binding protein family	psme_t054124	(at1g19210 : 122.0) encodes a member of the DREB subfamily A-5 of ERF/AP2 transcription factor family. The protein contains one AP2 domain. There are 15 members in this subfamily including RAP2.1, RAP2.9 and RAP2.10.; Integrase-type DNA-binding superfamily protein; FUNCTIONS IN: DNA binding, sequence-specific DNA binding transcription factor activity; INVOLVED IN: regulation of transcription, DNA…
27.3.3	RNA.regulation of transcription.AP2/EREBP, APETALA2/Ethylene-responsive element binding protein family	psme_t054720	(at1g74930 : 125.0) encodes a member of the DREB subfamily A-5 of ERF/AP2 transcription factor family. The protein contains one AP2 domain. There are 15 members in this subfamily including RAP2.1, RAP2.9 and RAP2.10.; ORA47; CONTAINS InterPro DOMAIN/s: DNA-binding, integrase-type (InterPro:IPR016177), Pathogenesis-related transcriptional factor/ERF, DNA-binding (InterPro:IPR001471); BEST Arabidop…
27.3.3	RNA.regulation of transcription.AP2/EREBP, APETALA2/Ethylene-responsive element binding protein family	psme_t068451	(at1g19210 : 127.0) encodes a member of the DREB subfamily A-5 of ERF/AP2 transcription factor family. The protein contains one AP2 domain. There are 15 members in this subfamily including RAP2.1, RAP2.9 and RAP2.10.; Integrase-type DNA-binding superfamily protein; FUNCTIONS IN: DNA binding, sequence-specific DNA binding transcription factor activity; INVOLVED IN: regulation of transcription, DNA…
27.3.3	RNA.regulation of transcription.AP2/EREBP, APETALA2/Ethylene-responsive element binding protein family	psme_t160943	(loc_os05g47650.1 : 112.0) no description available & (at3g25730 : 110.0) ethylene response DNA binding factor 3 (EDF3); FUNCTIONS IN: sequence-specific DNA binding transcription factor activity; INVOLVED IN: regulation of transcription, DNA-dependent; LOCATED IN: chloroplast; EXPRESSED IN: cotyledon, hypocotyl, root, flower, seed; EXPRESSED DURING: petal differentiation and expansion stage; CONT…
27.3.5	RNA.regulation of transcription.ARR	psme_t026966	(loc_os03g12350.4 : 85.5) no description available & (at4g16110 : 82.8) Encodes a pollen-specific transcription factor involved in the expression of nuclear genes for components of mitochondrial complex I in Arabidopsis. Acts in concert with other type-B ARRs in the cytokinin signaling pathway. AHK3 mediates cytokinin-induced phosphorylation of ARR2 on the Asp-80 residue. This phosphorylation pla…
27.3.5	RNA.regulation of transcription.ARR	psme_t029763	(at1g59940 : 158.0) Type A response regulator highly similar to bacterial two-component response regulators. Rapidly induced by cytokinin. Involved in red-light signaling. Acts redundantly with ARR3 in the control of circadian period in a cytokinin-independent manner.; response regulator 3 (ARR3); CONTAINS InterPro DOMAIN/s: CheY-like (InterPro:IPR011006), Signal transduction response regulator, …
27.3.5	RNA.regulation of transcription.ARR	psme_t030613	(loc_os01g72330.1 : 175.0) no description available & (at1g19050 : 174.0) Encodes a member of the Arabidopsis response regulator (ARR) family, most closely related to ARR15. A two-component response regulator protein containing a phosphate accepting domain in the receiver domain but lacking a DNA binding domain in the output domain. Involved in response to cytokinin and meristem stem cell mainten…
27.3.5	RNA.regulation of transcription.ARR	psme_t031632	(loc_os11g04720.2 : 176.0) no description available & (at3g57040 : 173.0) response regulator ARR9, A two-component response regulator-like protein with a receiver domain with a conserved aspartate residue and a possible phosphorylation site and at the N-terminal half. Appears to interact with histidine kinase like genes ATHP3 and ATHP2; response regulator 9 (ARR9); CONTAINS InterPro DOMAIN/s: Che…
27.3.5	RNA.regulation of transcription.ARR	psme_t040726	(at3g56380 : 155.0) response regulator 17; response regulator 17 (RR17); CONTAINS InterPro DOMAIN/s: CheY-like (InterPro:IPR011006), Signal transduction response regulator, receiver domain (InterPro:IPR001789); BEST Arabidopsis thaliana protein match is: response regulator 16 (TAIR:AT2G40670.1); Has 39813 Blast hits to 39289 proteins in 2430 species: Archae - 260; Bacteria - 34490; Metazoa - 15; …
27.3.5	RNA.regulation of transcription.ARR	psme_t060291	(loc_os01g72330.1 : 176.0) no description available & (at1g19050 : 175.0) Encodes a member of the Arabidopsis response regulator (ARR) family, most closely related to ARR15. A two-component response regulator protein containing a phosphate accepting domain in the receiver domain but lacking a DNA binding domain in the output domain. Involved in response to cytokinin and meristem stem cell mainten…
27.3.6	RNA.regulation of transcription.bHLH,Basic Helix-Loop-Helix family	psme_t010350	(at4g29100 : 157.0) basic helix-loop-helix (bHLH) DNA-binding superfamily protein; FUNCTIONS IN: sequence-specific DNA binding transcription factor activity; INVOLVED IN: regulation of transcription; LOCATED IN: nucleus; EXPRESSED IN: 22 plant structures; EXPRESSED DURING: 10 growth stages; CONTAINS InterPro DOMAIN/s: Helix-loop-helix DNA-binding domain (InterPro:IPR001092), Helix-loop-helix DNA-…
27.3.6	RNA.regulation of transcription.bHLH,Basic Helix-Loop-Helix family	psme_t014577	(at1g68810 : 177.0) basic helix-loop-helix (bHLH) DNA-binding superfamily protein; FUNCTIONS IN: DNA binding, sequence-specific DNA binding transcription factor activity; INVOLVED IN: regulation of transcription; LOCATED IN: nucleus; EXPRESSED IN: 20 plant structures; EXPRESSED DURING: 12 growth stages; CONTAINS InterPro DOMAIN/s: Helix-loop-helix DNA-binding domain (InterPro:IPR001092), Helix-lo…
27.3.6	RNA.regulation of transcription.bHLH,Basic Helix-Loop-Helix family	psme_t030673	(at5g04150 : 84.3) BHLH101; FUNCTIONS IN: DNA binding, sequence-specific DNA binding transcription factor activity; INVOLVED IN: regulation of transcription; LOCATED IN: nucleus; EXPRESSED IN: root, leaf; EXPRESSED DURING: LP.04 four leaves visible; CONTAINS InterPro DOMAIN/s: Helix-loop-helix DNA-binding domain (InterPro:IPR001092), Helix-loop-helix DNA-binding (InterPro:IPR011598); BEST Arabido…
27.3.6	RNA.regulation of transcription.bHLH,Basic Helix-Loop-Helix family	psme_t044724	(loc_os11g32100.1 : 129.0) no description available & (at3g26744 : 127.0) Encodes a MYC-like bHLH transcriptional activator that binds specifically to the MYC recognition sequences in the CBF3 promoter. Mutants are defective in cold-regulated gene expression. Cold stress triggers protein degradation of nuclear GFPICE1 protein, and the RING finger protein HOS1 is required. Sumoylation of ICE1 cont…
27.3.6	RNA.regulation of transcription.bHLH,Basic Helix-Loop-Helix family	psme_t067789	(at5g57150 : 80.9) basic helix-loop-helix (bHLH) DNA-binding superfamily protein; FUNCTIONS IN: DNA binding, sequence-specific DNA binding transcription factor activity; INVOLVED IN: regulation of transcription; LOCATED IN: nucleus; EXPRESSED IN: 24 plant structures; EXPRESSED DURING: 14 growth stages; CONTAINS InterPro DOMAIN/s: Helix-loop-helix DNA-binding domain (InterPro:IPR001092), Helix-loo…
27.3.6	RNA.regulation of transcription.bHLH,Basic Helix-Loop-Helix family	psme_t076663	(at4g02750 : 201.0) Tetratricopeptide repeat (TPR)-like superfamily protein; LOCATED IN: mitochondrion; EXPRESSED IN: 16 plant structures; EXPRESSED DURING: 7 growth stages; CONTAINS InterPro DOMAIN/s: Pentatricopeptide repeat (InterPro:IPR002885); BEST Arabidopsis thaliana protein match is: pentatricopeptide (PPR) repeat-containing protein (TAIR:AT1G09410.1); Has 56089 Blast hits to 14902 protei…
27.3.6	RNA.regulation of transcription.bHLH,Basic Helix-Loop-Helix family	psme_t127774	(loc_os10g40920.1 : 134.0) no description available & (at4g18750 : 127.0) Encodes a pentatricopeptide (PPR) protein involved in leaf and root development. dot4 mutants have an aberrant midgap venation pattern in juvenile leaves and cotyledons.; DEFECTIVELY ORGANIZED TRIBUTARIES 4 (DOT4); INVOLVED IN: cotyledon vascular tissue pattern formation, phloem or xylem histogenesis, leaf vascular tissue p…
27.3.6	RNA.regulation of transcription.bHLH,Basic Helix-Loop-Helix family	psme_t132802	(loc_os02g46560.1 : 102.0) no description available & (at1g72210 : 96.7) basic helix-loop-helix (bHLH) DNA-binding superfamily protein; FUNCTIONS IN: DNA binding, sequence-specific DNA binding transcription factor activity; INVOLVED IN: regulation of transcription; LOCATED IN: nucleus; CONTAINS InterPro DOMAIN/s: Helix-loop-helix DNA-binding domain (InterPro:IPR001092), Helix-loop-helix DNA-bindi…
27.3.6	RNA.regulation of transcription.bHLH,Basic Helix-Loop-Helix family	psme_t150579	(loc_os03g44210.2 : 125.0) no description available & (at1g68930 : 120.0) pentatricopeptide (PPR) repeat-containing protein; CONTAINS InterPro DOMAIN/s: Pentatricopeptide repeat (InterPro:IPR002885); BEST Arabidopsis thaliana protein match is: pentatricopeptide (PPR) repeat-containing protein (TAIR:AT2G22070.1); Has 47331 Blast hits to 14466 proteins in 272 species: Archae - 2; Bacteria - 18; Met…
27.3.6	RNA.regulation of transcription.bHLH,Basic Helix-Loop-Helix family	psme_t185200	(loc_os12g15460.1 : 108.0) no description available & (at3g23330 : 104.0) Tetratricopeptide repeat (TPR)-like superfamily protein; CONTAINS InterPro DOMAIN/s: Pentatricopeptide repeat (InterPro:IPR002885); BEST Arabidopsis thaliana protein match is: mitochondrial editing factor 22 (TAIR:AT3G12770.1); Has 38045 Blast hits to 13879 proteins in 261 species: Archae - 0; Bacteria - 10; Metazoa - 50; F…
27.3.8	RNA.regulation of transcription.C2C2(Zn) DOF zinc finger family	psme_t005030	(loc_os01g15900.1 : 274.0) no description available & (at3g47500 : 192.0) Dof-type zinc finger domain-containing protein, identical to H-protein promoter binding factor-2a GI:3386546 from (Arabidopsis thaliana). Interacts with LKP2 and FKF1, but its overexpression does not change flowering time under short or long day conditions.; cycling DOF factor 3 (CDF3); CONTAINS InterPro DOMAIN/s: Zinc fing…
27.3.8	RNA.regulation of transcription.C2C2(Zn) DOF zinc finger family	psme_t021323	(loc_os02g47810.1 : 95.1) no description available & (at5g62940 : 93.2) HCA2 induces the formation of interfascicular cambium and regulates vascular tissue development in the aerial parts of the plant. Evidence from both gain of function and dominant negative alleles.; HIGH CAMBIAL ACTIVITY2 (HCA2); CONTAINS InterPro DOMAIN/s: Zinc finger, Dof-type (InterPro:IPR003851); BEST Arabidopsis thaliana …
27.3.9	RNA.regulation of transcription.C2C2(Zn) GATA transcription factor family	psme_t011918	(loc_os05g44400.1 : 201.0) no description available & (at5g25830 : 199.0) Encodes a member of the GATA factor family of zinc finger transcription factors.; GATA transcription factor 12 (GATA12); CONTAINS InterPro DOMAIN/s: Zinc finger, NHR/GATA-type (InterPro:IPR013088), Transcription factor, GATA, plant (InterPro:IPR016679), Zinc finger, GATA-type (InterPro:IPR000679); BEST Arabidopsis thaliana …
27.3.10	RNA.regulation of transcription.C2C2(Zn) YABBY family	psme_t027794	(at2g26580 : 152.0) YABBY5 (YAB5); CONTAINS InterPro DOMAIN/s: High mobility group, superfamily (InterPro:IPR009071), YABBY protein (InterPro:IPR006780); BEST Arabidopsis thaliana protein match is: Plant-specific transcription factor YABBY family protein (TAIR:AT1G08465.1); Has 458 Blast hits to 449 proteins in 126 species: Archae - 0; Bacteria - 0; Metazoa - 0; Fungi - 4; Plants - 444; Viruses -…
27.3.10	RNA.regulation of transcription.C2C2(Zn) YABBY family	psme_t031238	(at2g26580 : 167.0) YABBY5 (YAB5); CONTAINS InterPro DOMAIN/s: High mobility group, superfamily (InterPro:IPR009071), YABBY protein (InterPro:IPR006780); BEST Arabidopsis thaliana protein match is: Plant-specific transcription factor YABBY family protein (TAIR:AT1G08465.1); Has 458 Blast hits to 449 proteins in 126 species: Archae - 0; Bacteria - 0; Metazoa - 0; Fungi - 4; Plants - 444; Viruses -…
27.3.11	RNA.regulation of transcription.C2H2 zinc finger family	psme_t016848	(loc_os01g04120.1 : 90.1) no description available & (at1g68360 : 82.4) C2H2 and C2HC zinc fingers superfamily protein; FUNCTIONS IN: sequence-specific DNA binding transcription factor activity; INVOLVED IN: regulation of transcription; LOCATED IN: intracellular; EXPRESSED IN: 12 plant structures; EXPRESSED DURING: 4 anthesis, F mature embryo stage, petal differentiation and expansion stage, E ex…
27.3.11	RNA.regulation of transcription.C2H2 zinc finger family	psme_t027227	(loc_os06g41010.4 : 168.0) no description available & (at3g52800 : 164.0) A20/AN1-like zinc finger family protein; FUNCTIONS IN: DNA binding, zinc ion binding; INVOLVED IN: response to chitin; LOCATED IN: cellular_component unknown; EXPRESSED IN: 23 plant structures; EXPRESSED DURING: 15 growth stages; CONTAINS InterPro DOMAIN/s: Zinc finger, AN1-type (InterPro:IPR000058), Zinc finger, A20-type (…
27.3.11	RNA.regulation of transcription.C2H2 zinc finger family	psme_t038928	(at3g57670 : 87.8) NO TRANSMITTING TRACT (NTT); CONTAINS InterPro DOMAIN/s: Zinc finger, C2H2-like (InterPro:IPR015880), Zinc finger, C2H2-type (InterPro:IPR007087); BEST Arabidopsis thaliana protein match is: WIP domain protein 4 (TAIR:AT3G20880.1); Has 16303 Blast hits to 11155 proteins in 263 species: Archae - 2; Bacteria - 36; Metazoa - 14565; Fungi - 231; Plants - 853; Viruses - 60; Other Eu…
27.3.11	RNA.regulation of transcription.C2H2 zinc finger family	psme_t047153	(at3g57670 : 96.3) NO TRANSMITTING TRACT (NTT); CONTAINS InterPro DOMAIN/s: Zinc finger, C2H2-like (InterPro:IPR015880), Zinc finger, C2H2-type (InterPro:IPR007087); BEST Arabidopsis thaliana protein match is: WIP domain protein 4 (TAIR:AT3G20880.1); Has 16303 Blast hits to 11155 proteins in 263 species: Archae - 2; Bacteria - 36; Metazoa - 14565; Fungi - 231; Plants - 853; Viruses - 60; Other Eu…
27.3.11	RNA.regulation of transcription.C2H2 zinc finger family	psme_t078830	(at4g21160 : 89.0) ADP-ribosylation factor GTPase-activating protein containing zinc finger and C2 domains and a novel PI-3-P-binding protein region. Binds PI-3-P. Highest expression levels in flowering tissue, rosettes and roots. A member of ARF GAP domain (AGD), A thaliana has 15 members, grouped into four classes.; ZAC; FUNCTIONS IN: phospholipid binding, ARF GTPase activator activity; INVOLVE…
27.3.12	RNA.regulation of transcription.C3H zinc finger family	psme_t000505	(at2g41900 : 535.0) CCCH-type zinc finger protein with ARM repeat domain; CONTAINS InterPro DOMAIN/s: Zinc finger, CCCH-type (InterPro:IPR000571), Ankyrin repeat-containing domain (InterPro:IPR020683), Ankyrin repeat (InterPro:IPR002110); BEST Arabidopsis thaliana protein match is: CCCH-type zinc finger protein with ARM repeat domain (TAIR:AT5G12850.1); Has 5399 Blast hits to 3519 proteins in 384…
27.3.12	RNA.regulation of transcription.C3H zinc finger family	psme_t004622	(at2g41900 : 598.0) CCCH-type zinc finger protein with ARM repeat domain; CONTAINS InterPro DOMAIN/s: Zinc finger, CCCH-type (InterPro:IPR000571), Ankyrin repeat-containing domain (InterPro:IPR020683), Ankyrin repeat (InterPro:IPR002110); BEST Arabidopsis thaliana protein match is: CCCH-type zinc finger protein with ARM repeat domain (TAIR:AT5G12850.1); Has 5399 Blast hits to 3519 proteins in 384…
27.3.12	RNA.regulation of transcription.C3H zinc finger family	psme_t013777	(at5g51980 : 232.0) Transducin/WD40 repeat-like superfamily protein; FUNCTIONS IN: zinc ion binding, nucleic acid binding; INVOLVED IN: biological_process unknown; LOCATED IN: cellular_component unknown; EXPRESSED IN: 23 plant structures; EXPRESSED DURING: 13 growth stages; CONTAINS InterPro DOMAIN/s: Zinc finger, CCCH-type (InterPro:IPR000571), WD40 repeat 2 (InterPro:IPR019782), WD40 repeat, co…
27.3.12	RNA.regulation of transcription.C3H zinc finger family	psme_t017731	(at5g51980 : 197.0) Transducin/WD40 repeat-like superfamily protein; FUNCTIONS IN: zinc ion binding, nucleic acid binding; INVOLVED IN: biological_process unknown; LOCATED IN: cellular_component unknown; EXPRESSED IN: 23 plant structures; EXPRESSED DURING: 13 growth stages; CONTAINS InterPro DOMAIN/s: Zinc finger, CCCH-type (InterPro:IPR000571), WD40 repeat 2 (InterPro:IPR019782), WD40 repeat, co…
27.3.14	RNA.regulation of transcription.CCAAT box binding factor family, HAP2	psme_t056014	(loc_os12g41880.1 : 116.0) no description available & (at1g30500 : 103.0) "nuclear factor Y, subunit A7" (NF-YA7); FUNCTIONS IN: sequence-specific DNA binding transcription factor activity, specific transcriptional repressor activity; INVOLVED IN: negative regulation of gene-specific transcription, regulation of transcription, DNA-dependent; LOCATED IN: CCAAT-binding factor complex, nucleus; EXPR…
27.3.15	RNA.regulation of transcription.CCAAT box binding factor family, HAP3	psme_t023155	(at4g14540 : 207.0) "nuclear factor Y, subunit B3" (NF-YB3); FUNCTIONS IN: sequence-specific DNA binding transcription factor activity; INVOLVED IN: regulation of transcription, DNA-dependent; LOCATED IN: nucleus, intracellular; EXPRESSED IN: 21 plant structures; EXPRESSED DURING: 13 growth stages; CONTAINS InterPro DOMAIN/s: Transcription factor, CBFA/NFYB, DNA topoisomerase (InterPro:IPR003957)…
27.3.16	RNA.regulation of transcription.CCAAT box binding factor family, HAP5	psme_t017499	(loc_os02g07450.2 : 192.0) no description available & (at1g56170 : 189.0) Encodes a protein with similarity to a subunit of the CCAAT promoter motif binding complex of yeast.One of two members of this class (HAP5B) and expressed in vegetative and reproductive tissues; "nuclear factor Y, subunit C2" (NF-YC2); CONTAINS InterPro DOMAIN/s: Transcription factor CBF/NF-Y/archaeal histone (InterPro:IPR0…
27.3.16	RNA.regulation of transcription.CCAAT box binding factor family, HAP5	psme_t023613	(loc_os02g07450.2 : 192.0) no description available & (at1g56170 : 189.0) Encodes a protein with similarity to a subunit of the CCAAT promoter motif binding complex of yeast.One of two members of this class (HAP5B) and expressed in vegetative and reproductive tissues; "nuclear factor Y, subunit C2" (NF-YC2); CONTAINS InterPro DOMAIN/s: Transcription factor CBF/NF-Y/archaeal histone (InterPro:IPR0…
27.3.16	RNA.regulation of transcription.CCAAT box binding factor family, HAP5	psme_t028560	(at1g56170 : 181.0) Encodes a protein with similarity to a subunit of the CCAAT promoter motif binding complex of yeast.One of two members of this class (HAP5B) and expressed in vegetative and reproductive tissues; "nuclear factor Y, subunit C2" (NF-YC2); CONTAINS InterPro DOMAIN/s: Transcription factor CBF/NF-Y/archaeal histone (InterPro:IPR003958), Histone-fold (InterPro:IPR009072); BEST Arabid…
27.3.16	RNA.regulation of transcription.CCAAT box binding factor family, HAP5	psme_t044823	(at1g56170 : 177.0) Encodes a protein with similarity to a subunit of the CCAAT promoter motif binding complex of yeast.One of two members of this class (HAP5B) and expressed in vegetative and reproductive tissues; "nuclear factor Y, subunit C2" (NF-YC2); CONTAINS InterPro DOMAIN/s: Transcription factor CBF/NF-Y/archaeal histone (InterPro:IPR003958), Histone-fold (InterPro:IPR009072); BEST Arabid…
27.3.20	RNA.regulation of transcription.G2-like transcription factor family, GARP	psme_t020989	(loc_os04g47890.1 : 124.0) no description available & (at2g40260 : 115.0) Homeodomain-like superfamily protein; CONTAINS InterPro DOMAIN/s: Homeodomain-like (InterPro:IPR009057), Myb, DNA-binding (InterPro:IPR014778), HTH transcriptional regulator, Myb-type, DNA-binding (InterPro:IPR017930), Myb-like DNA-binding domain, SHAQKYF class (InterPro:IPR006447), Homeodomain-related (InterPro:IPR012287);…
27.3.20	RNA.regulation of transcription.G2-like transcription factor family, GARP	psme_t033110	(loc_os03g03760.1 : 119.0) no description available & (at2g40260 : 111.0) Homeodomain-like superfamily protein; CONTAINS InterPro DOMAIN/s: Homeodomain-like (InterPro:IPR009057), Myb, DNA-binding (InterPro:IPR014778), HTH transcriptional regulator, Myb-type, DNA-binding (InterPro:IPR017930), Myb-like DNA-binding domain, SHAQKYF class (InterPro:IPR006447), Homeodomain-related (InterPro:IPR012287);…
27.3.20	RNA.regulation of transcription.G2-like transcription factor family, GARP	psme_t038982	(at1g32240 : 130.0) Encodes a member of the KANADI family of putative transcription factors. Together with KAN1, this gene appears to be involved in the development of the carpel and the outer integument of the ovule.Along with KAN1 and KAN4 appears to regulate the proper localization of PIN1 in early embryogenesis.; KANADI 2 (KAN2); CONTAINS InterPro DOMAIN/s: Homeodomain-like (InterPro:IPR00905…
27.3.21	RNA.regulation of transcription.GRAS transcription factor family	psme_t021699	(q5ne24|nsp2_medtr : 182.0) Nodulation signaling pathway 2 protein - Medicago truncatula (Barrel medic) & (at4g08250 : 168.0) GRAS family transcription factor; CONTAINS InterPro DOMAIN/s: Transcription factor GRAS (InterPro:IPR005202); BEST Arabidopsis thaliana protein match is: RGA-like protein 3 (TAIR:AT5G17490.1); Has 2377 Blast hits to 2344 proteins in 299 species: Archae - 0; Bacteria - 2; M…
27.3.22	RNA.regulation of transcription.HB,Homeobox transcription factor family	psme_t004583	(at4g04890 : 956.0) Encodes a homeodomain protein that is expressed in the LI layer of the vegetative, floral and inflorescence meristems. Binds to the L1 box promoter element which is required in some proteins for L1 specific expression.; protodermal factor 2 (PDF2); FUNCTIONS IN: DNA binding, sequence-specific DNA binding transcription factor activity; INVOLVED IN: epidermal cell differentiatio…
27.3.22	RNA.regulation of transcription.HB,Homeobox transcription factor family	psme_t007173	(loc_os03g43930.2 : 516.0) no description available & (at1g52150 : 483.0) Member of the class III HD-ZIP protein family. Contains homeodomain and leucine zipper domain. Critical for vascular development and negatively regulates vascular cell differentiation.; ATHB-15; CONTAINS InterPro DOMAIN/s: Homeobox (InterPro:IPR001356), Homeodomain-like (InterPro:IPR009057), Lipid-binding START (InterPro:IP…
27.3.22	RNA.regulation of transcription.HB,Homeobox transcription factor family	psme_t008343	(loc_os03g43930.2 : 795.0) no description available & (at1g52150 : 758.0) Member of the class III HD-ZIP protein family. Contains homeodomain and leucine zipper domain. Critical for vascular development and negatively regulates vascular cell differentiation.; ATHB-15; CONTAINS InterPro DOMAIN/s: Homeobox (InterPro:IPR001356), Homeodomain-like (InterPro:IPR009057), Lipid-binding START (InterPro:IP…
27.3.22	RNA.regulation of transcription.HB,Homeobox transcription factor family	psme_t008492	(loc_os04g53540.1 : 1068.0) no description available & (at4g04890 : 1051.0) Encodes a homeodomain protein that is expressed in the LI layer of the vegetative, floral and inflorescence meristems. Binds to the L1 box promoter element which is required in some proteins for L1 specific expression.; protodermal factor 2 (PDF2); FUNCTIONS IN: DNA binding, sequence-specific DNA binding transcription fac…
27.3.22	RNA.regulation of transcription.HB,Homeobox transcription factor family	psme_t017680	(o04135|knap2_maldo : 327.0) Homeobox protein knotted-1-like 2 (KNAP2) - Malus domestica (Apple) (Malus sylvestris) & (at4g08150 : 315.0) A member of class I knotted1-like homeobox gene family (together with KNAT2). Similar to the knotted1 (kn1) homeobox gene of maize. Normally expressed in the peripheral and rib zone of shoot apical meristem but not in the leaf primordia. It is also expressed in…
27.3.22	RNA.regulation of transcription.HB,Homeobox transcription factor family	psme_t030978	(at4g08150 : 281.0) A member of class I knotted1-like homeobox gene family (together with KNAT2). Similar to the knotted1 (kn1) homeobox gene of maize. Normally expressed in the peripheral and rib zone of shoot apical meristem but not in the leaf primordia. It is also expressed in the fourth floral whorl, in the region that would become style, particularly in the cell surrounding the transmitting…
27.3.22	RNA.regulation of transcription.HB,Homeobox transcription factor family	psme_t036201	(loc_os01g60270.2 : 182.0) no description available & (at4g35550 : 153.0) Encodes a WUSCHEL-related homeobox gene family member with 65 amino acids in its homeodomain. WOX13 is the only family member that does not contain a sequence of eight residues (TLPLFPMH) downstream of the homeodomain called the WUS box.; WUSCHEL related homeobox 13 (WOX13); FUNCTIONS IN: DNA binding, sequence-specific DNA …
27.3.22	RNA.regulation of transcription.HB,Homeobox transcription factor family	psme_t046668	(at1g52150 : 238.0) Member of the class III HD-ZIP protein family. Contains homeodomain and leucine zipper domain. Critical for vascular development and negatively regulates vascular cell differentiation.; ATHB-15; CONTAINS InterPro DOMAIN/s: Homeobox (InterPro:IPR001356), Homeodomain-like (InterPro:IPR009057), Lipid-binding START (InterPro:IPR002913), MEKHLA (InterPro:IPR013978), Homeodomain-rel…
27.3.22	RNA.regulation of transcription.HB,Homeobox transcription factor family	psme_t084331	(at2g22430 : 95.9) Encodes a homeodomain leucine zipper class I (HD-Zip I) protein that is a target of the protein phosphatase ABI1 and regulates hormone responses in Arabidopsis.; homeobox protein 6 (HB6); FUNCTIONS IN: protein binding, sequence-specific DNA binding, DNA binding, transcription activator activity, sequence-specific DNA binding transcription factor activity; INVOLVED IN: response …
27.3.23	RNA.regulation of transcription.HSF,Heat-shock transcription factor family	psme_t006456	(at5g16820 : 257.0) Encodes a putative transcription factor whose expression is not induced by heat but whose stable overexpression leads to expression of HSP. Required early in the stress response for transient expression of heat shock genes.; heat shock factor 3 (HSF3); CONTAINS InterPro DOMAIN/s: Winged helix-turn-helix transcription repressor DNA-binding (InterPro:IPR011991), Heat shock facto…
27.3.23	RNA.regulation of transcription.HSF,Heat-shock transcription factor family	psme_t013181	(at5g16820 : 256.0) Encodes a putative transcription factor whose expression is not induced by heat but whose stable overexpression leads to expression of HSP. Required early in the stress response for transient expression of heat shock genes.; heat shock factor 3 (HSF3); CONTAINS InterPro DOMAIN/s: Winged helix-turn-helix transcription repressor DNA-binding (InterPro:IPR011991), Heat shock facto…
27.3.23	RNA.regulation of transcription.HSF,Heat-shock transcription factor family	psme_t018913	(loc_os08g43334.2 : 201.0) no description available & (at5g62020 : 189.0) member of Heat Stress Transcription Factor (Hsf) family; heat shock transcription factor B2A (HSFB2A); FUNCTIONS IN: DNA binding, sequence-specific DNA binding transcription factor activity; INVOLVED IN: response to chitin; LOCATED IN: nucleus; EXPRESSED IN: 18 plant structures; EXPRESSED DURING: 11 growth stages; CONTAINS …
27.3.23	RNA.regulation of transcription.HSF,Heat-shock transcription factor family	psme_t020124	(loc_os08g43334.2 : 217.0) no description available & (at5g62020 : 205.0) member of Heat Stress Transcription Factor (Hsf) family; heat shock transcription factor B2A (HSFB2A); FUNCTIONS IN: DNA binding, sequence-specific DNA binding transcription factor activity; INVOLVED IN: response to chitin; LOCATED IN: nucleus; EXPRESSED IN: 18 plant structures; EXPRESSED DURING: 11 growth stages; CONTAINS …
27.3.24	RNA.regulation of transcription.MADS box transcription factor family	psme_t024890	(at2g45660 : 188.0) Controls flowering and is required for CO to promote flowering. It acts downstream of FT. Overexpression of (SOC1) AGL20 suppresses not only the late flowering of plants that have functional FRI and FLC alleles but also the delayed phase transitions during the vegetative stages of development. AGL20/SOC1 acts with AGL24 to promote flowering and inflorescence meristem identity.…
27.3.24	RNA.regulation of transcription.MADS box transcription factor family	psme_t028782	(at2g45660 : 189.0) Controls flowering and is required for CO to promote flowering. It acts downstream of FT. Overexpression of (SOC1) AGL20 suppresses not only the late flowering of plants that have functional FRI and FLC alleles but also the delayed phase transitions during the vegetative stages of development. AGL20/SOC1 acts with AGL24 to promote flowering and inflorescence meristem identity.…
27.3.24	RNA.regulation of transcription.MADS box transcription factor family	psme_t029432	(at1g26310 : 126.0) Floral homeotic gene encoding a MADS domain protein homologous to AP1. Enhances the flower to shoot transformation in ap1 mutants.; CAULIFLOWER (CAL); FUNCTIONS IN: DNA binding, sequence-specific DNA binding transcription factor activity; INVOLVED IN: positive regulation of flower development, floral meristem determinacy; LOCATED IN: nucleus; EXPRESSED IN: 12 plant structures;…
27.3.25	RNA.regulation of transcription.MYB domain transcription factor family	psme_t009619	(loc_os09g15800.1 : 245.0) no description available & (at2g13600 : 242.0) Pentatricopeptide repeat (PPR) superfamily protein; CONTAINS InterPro DOMAIN/s: Pentatricopeptide repeat (InterPro:IPR002885); BEST Arabidopsis thaliana protein match is: pentatricopeptide (PPR) repeat-containing protein (TAIR:AT2G22070.1); Has 46660 Blast hits to 13875 proteins in 226 species: Archae - 0; Bacteria - 4; Met…
27.3.25	RNA.regulation of transcription.MYB domain transcription factor family	psme_t012206	(at3g49690 : 223.0) "Putative homolog of the Blind gene in tomato. Together with RAX1 and RAX3 belong to the class R2R3 MYB genes; encoded by the Myb-like transcription factor MYB84, regulates axillary meristem formation. "; myb domain protein 84 (MYB84); CONTAINS InterPro DOMAIN/s: SANT, DNA-binding (InterPro:IPR001005), Homeodomain-like (InterPro:IPR009057), Myb, DNA-binding (InterPro:IPR014778…
27.3.25	RNA.regulation of transcription.MYB domain transcription factor family	psme_t020989	(loc_os04g47890.1 : 124.0) no description available & (at2g40260 : 115.0) Homeodomain-like superfamily protein; CONTAINS InterPro DOMAIN/s: Homeodomain-like (InterPro:IPR009057), Myb, DNA-binding (InterPro:IPR014778), HTH transcriptional regulator, Myb-type, DNA-binding (InterPro:IPR017930), Myb-like DNA-binding domain, SHAQKYF class (InterPro:IPR006447), Homeodomain-related (InterPro:IPR012287);…
27.3.25	RNA.regulation of transcription.MYB domain transcription factor family	psme_t022320	(at2g22070 : 239.0) pentatricopeptide (PPR) repeat-containing protein; CONTAINS InterPro DOMAIN/s: Pentatricopeptide repeat (InterPro:IPR002885); BEST Arabidopsis thaliana protein match is: Pentatricopeptide repeat (PPR) superfamily protein (TAIR:AT1G25360.1); Has 47939 Blast hits to 14346 proteins in 287 species: Archae - 0; Bacteria - 20; Metazoa - 98; Fungi - 122; Plants - 46979; Viruses - 0; …
27.3.25	RNA.regulation of transcription.MYB domain transcription factor family	psme_t022404	(at5g55020 : 216.0) Encodes a putative transcription factor, member of the R2R3 factor gene family (MYB120).; myb domain protein 120 (MYB120); CONTAINS InterPro DOMAIN/s: SANT, DNA-binding (InterPro:IPR001005), Homeodomain-like (InterPro:IPR009057), Myb, DNA-binding (InterPro:IPR014778), HTH transcriptional regulator, Myb-type, DNA-binding (InterPro:IPR017930), Homeodomain-related (InterPro:IPR01…
27.3.25	RNA.regulation of transcription.MYB domain transcription factor family	psme_t024004	(loc_os02g05720.1 : 151.0) no description available & (at3g49142 : 143.0) Tetratricopeptide repeat (TPR)-like superfamily protein; CONTAINS InterPro DOMAIN/s: Pentatricopeptide repeat (InterPro:IPR002885); BEST Arabidopsis thaliana protein match is: Tetratricopeptide repeat (TPR)-like superfamily protein (TAIR:AT4G33990.1). & (reliability: 278.0) & (original description: no original description)
27.3.25	RNA.regulation of transcription.MYB domain transcription factor family	psme_t028135	(at4g39250 : 102.0) RAD-like 1 (RL1); CONTAINS InterPro DOMAIN/s: Molecular chaperone, heat shock protein, Hsp40, DnaJ (InterPro:IPR015609), SANT, DNA-binding (InterPro:IPR001005), Myb, DNA-binding (InterPro:IPR014778), Homeodomain-like (InterPro:IPR009057), SANT, eukarya (InterPro:IPR017884); BEST Arabidopsis thaliana protein match is: Homeodomain-like superfamily protein (TAIR:AT2G21650.1); Has…
27.3.25	RNA.regulation of transcription.MYB domain transcription factor family	psme_t029406	(at5g57620 : 234.0) Encodes a putative transcription factor (MYB36).; myb domain protein 36 (MYB36); CONTAINS InterPro DOMAIN/s: SANT, DNA-binding (InterPro:IPR001005), Homeodomain-like (InterPro:IPR009057), Myb, DNA-binding (InterPro:IPR014778), HTH transcriptional regulator, Myb-type, DNA-binding (InterPro:IPR017930), Homeodomain-related (InterPro:IPR012287), Myb transcription factor (InterPro:…
27.3.25	RNA.regulation of transcription.MYB domain transcription factor family	psme_t030147	(at5g57620 : 239.0) Encodes a putative transcription factor (MYB36).; myb domain protein 36 (MYB36); CONTAINS InterPro DOMAIN/s: SANT, DNA-binding (InterPro:IPR001005), Homeodomain-like (InterPro:IPR009057), Myb, DNA-binding (InterPro:IPR014778), HTH transcriptional regulator, Myb-type, DNA-binding (InterPro:IPR017930), Homeodomain-related (InterPro:IPR012287), Myb transcription factor (InterPro:…
27.3.25	RNA.regulation of transcription.MYB domain transcription factor family	psme_t033080	(at4g39250 : 105.0) RAD-like 1 (RL1); CONTAINS InterPro DOMAIN/s: Molecular chaperone, heat shock protein, Hsp40, DnaJ (InterPro:IPR015609), SANT, DNA-binding (InterPro:IPR001005), Myb, DNA-binding (InterPro:IPR014778), Homeodomain-like (InterPro:IPR009057), SANT, eukarya (InterPro:IPR017884); BEST Arabidopsis thaliana protein match is: Homeodomain-like superfamily protein (TAIR:AT2G21650.1); Has…
27.3.25	RNA.regulation of transcription.MYB domain transcription factor family	psme_t033110	(loc_os03g03760.1 : 119.0) no description available & (at2g40260 : 111.0) Homeodomain-like superfamily protein; CONTAINS InterPro DOMAIN/s: Homeodomain-like (InterPro:IPR009057), Myb, DNA-binding (InterPro:IPR014778), HTH transcriptional regulator, Myb-type, DNA-binding (InterPro:IPR017930), Myb-like DNA-binding domain, SHAQKYF class (InterPro:IPR006447), Homeodomain-related (InterPro:IPR012287);…
27.3.25	RNA.regulation of transcription.MYB domain transcription factor family	psme_t035061	(at4g39250 : 106.0) RAD-like 1 (RL1); CONTAINS InterPro DOMAIN/s: Molecular chaperone, heat shock protein, Hsp40, DnaJ (InterPro:IPR015609), SANT, DNA-binding (InterPro:IPR001005), Myb, DNA-binding (InterPro:IPR014778), Homeodomain-like (InterPro:IPR009057), SANT, eukarya (InterPro:IPR017884); BEST Arabidopsis thaliana protein match is: Homeodomain-like superfamily protein (TAIR:AT2G21650.1); Has…
27.3.25	RNA.regulation of transcription.MYB domain transcription factor family	psme_t035917	(loc_os09g15800.1 : 244.0) no description available & (at4g02750 : 239.0) Tetratricopeptide repeat (TPR)-like superfamily protein; LOCATED IN: mitochondrion; EXPRESSED IN: 16 plant structures; EXPRESSED DURING: 7 growth stages; CONTAINS InterPro DOMAIN/s: Pentatricopeptide repeat (InterPro:IPR002885); BEST Arabidopsis thaliana protein match is: pentatricopeptide (PPR) repeat-containing protein (T…
27.3.25	RNA.regulation of transcription.MYB domain transcription factor family	psme_t036338	(loc_os02g41510.1 : 206.0) no description available & (at3g02940 : 205.0) Encodes a putative transcription factor (MYB107).; myb domain protein 107 (MYB107); CONTAINS InterPro DOMAIN/s: SANT, DNA-binding (InterPro:IPR001005), Homeodomain-like (InterPro:IPR009057), Myb, DNA-binding (InterPro:IPR014778), HTH transcriptional regulator, Myb-type, DNA-binding (InterPro:IPR017930), Homeodomain-related …
27.3.25	RNA.regulation of transcription.MYB domain transcription factor family	psme_t036758	(at2g22070 : 165.0) pentatricopeptide (PPR) repeat-containing protein; CONTAINS InterPro DOMAIN/s: Pentatricopeptide repeat (InterPro:IPR002885); BEST Arabidopsis thaliana protein match is: Pentatricopeptide repeat (PPR) superfamily protein (TAIR:AT1G25360.1); Has 47939 Blast hits to 14346 proteins in 287 species: Archae - 0; Bacteria - 20; Metazoa - 98; Fungi - 122; Plants - 46979; Viruses - 0; …
27.3.25	RNA.regulation of transcription.MYB domain transcription factor family	psme_t038982	(at1g32240 : 130.0) Encodes a member of the KANADI family of putative transcription factors. Together with KAN1, this gene appears to be involved in the development of the carpel and the outer integument of the ovule.Along with KAN1 and KAN4 appears to regulate the proper localization of PIN1 in early embryogenesis.; KANADI 2 (KAN2); CONTAINS InterPro DOMAIN/s: Homeodomain-like (InterPro:IPR00905…
27.3.25	RNA.regulation of transcription.MYB domain transcription factor family	psme_t039219	(loc_os04g35610.1 : 302.0) no description available & (at2g13600 : 299.0) Pentatricopeptide repeat (PPR) superfamily protein; CONTAINS InterPro DOMAIN/s: Pentatricopeptide repeat (InterPro:IPR002885); BEST Arabidopsis thaliana protein match is: pentatricopeptide (PPR) repeat-containing protein (TAIR:AT2G22070.1); Has 46660 Blast hits to 13875 proteins in 226 species: Archae - 0; Bacteria - 4; Met…
27.3.25	RNA.regulation of transcription.MYB domain transcription factor family	psme_t050121	(loc_os07g39910.1 : 85.5) no description available & (at1g25360 : 80.1) Pentatricopeptide repeat (PPR) superfamily protein; FUNCTIONS IN: molecular_function unknown; INVOLVED IN: biological_process unknown; LOCATED IN: cellular_component unknown; EXPRESSED IN: 16 plant structures; EXPRESSED DURING: 9 growth stages; CONTAINS InterPro DOMAIN/s: Pentatricopeptide repeat (InterPro:IPR002885); BEST Ar…
27.3.25	RNA.regulation of transcription.MYB domain transcription factor family	psme_t051058	(loc_os02g05720.1 : 373.0) no description available & (at2g22070 : 366.0) pentatricopeptide (PPR) repeat-containing protein; CONTAINS InterPro DOMAIN/s: Pentatricopeptide repeat (InterPro:IPR002885); BEST Arabidopsis thaliana protein match is: Pentatricopeptide repeat (PPR) superfamily protein (TAIR:AT1G25360.1); Has 47939 Blast hits to 14346 proteins in 287 species: Archae - 0; Bacteria - 20; Me…
27.3.25	RNA.regulation of transcription.MYB domain transcription factor family	psme_t052809	(loc_os07g39910.1 : 174.0) no description available & (at1g16480 : 170.0) Tetratricopeptide repeat (TPR)-like superfamily protein; FUNCTIONS IN: molecular_function unknown; INVOLVED IN: biological_process unknown; LOCATED IN: cellular_component unknown; EXPRESSED IN: shoot apex; CONTAINS InterPro DOMAIN/s: Pentatricopeptide repeat (InterPro:IPR002885); BEST Arabidopsis thaliana protein match is: …
27.3.25	RNA.regulation of transcription.MYB domain transcription factor family	psme_t054540	(loc_os09g07780.1 : 295.0) no description available & (at3g49170 : 289.0) embryo defective 2261 (EMB2261); INVOLVED IN: embryo development ending in seed dormancy; LOCATED IN: chloroplast; CONTAINS InterPro DOMAIN/s: Pentatricopeptide repeat (InterPro:IPR002885); BEST Arabidopsis thaliana protein match is: Tetratricopeptide repeat (TPR)-like superfamily protein (TAIR:AT3G57430.1); Has 48732 Blast…
27.3.25	RNA.regulation of transcription.MYB domain transcription factor family	psme_t054680	(at2g22070 : 149.0) pentatricopeptide (PPR) repeat-containing protein; CONTAINS InterPro DOMAIN/s: Pentatricopeptide repeat (InterPro:IPR002885); BEST Arabidopsis thaliana protein match is: Pentatricopeptide repeat (PPR) superfamily protein (TAIR:AT1G25360.1); Has 47939 Blast hits to 14346 proteins in 287 species: Archae - 0; Bacteria - 20; Metazoa - 98; Fungi - 122; Plants - 46979; Viruses - 0; …
27.3.25	RNA.regulation of transcription.MYB domain transcription factor family	psme_t059509	(loc_os09g15800.1 : 334.0) no description available & (at2g22070 : 326.0) pentatricopeptide (PPR) repeat-containing protein; CONTAINS InterPro DOMAIN/s: Pentatricopeptide repeat (InterPro:IPR002885); BEST Arabidopsis thaliana protein match is: Pentatricopeptide repeat (PPR) superfamily protein (TAIR:AT1G25360.1); Has 47939 Blast hits to 14346 proteins in 287 species: Archae - 0; Bacteria - 20; Me…
27.3.25	RNA.regulation of transcription.MYB domain transcription factor family	psme_t065651	(at4g02750 : 241.0) Tetratricopeptide repeat (TPR)-like superfamily protein; LOCATED IN: mitochondrion; EXPRESSED IN: 16 plant structures; EXPRESSED DURING: 7 growth stages; CONTAINS InterPro DOMAIN/s: Pentatricopeptide repeat (InterPro:IPR002885); BEST Arabidopsis thaliana protein match is: pentatricopeptide (PPR) repeat-containing protein (TAIR:AT1G09410.1); Has 56089 Blast hits to 14902 protei…
27.3.25	RNA.regulation of transcription.MYB domain transcription factor family	psme_t070099	(at4g02750 : 283.0) Tetratricopeptide repeat (TPR)-like superfamily protein; LOCATED IN: mitochondrion; EXPRESSED IN: 16 plant structures; EXPRESSED DURING: 7 growth stages; CONTAINS InterPro DOMAIN/s: Pentatricopeptide repeat (InterPro:IPR002885); BEST Arabidopsis thaliana protein match is: pentatricopeptide (PPR) repeat-containing protein (TAIR:AT1G09410.1); Has 56089 Blast hits to 14902 protei…
27.3.25	RNA.regulation of transcription.MYB domain transcription factor family	psme_t071762	(at4g33170 : 197.0) Tetratricopeptide repeat (TPR)-like superfamily protein; LOCATED IN: chloroplast; EXPRESSED IN: 9 plant structures; EXPRESSED DURING: 4 anthesis, F mature embryo stage, petal differentiation and expansion stage, E expanded cotyledon stage, D bilateral stage; CONTAINS InterPro DOMAIN/s: Pentatricopeptide repeat (InterPro:IPR002885); BEST Arabidopsis thaliana protein match is: T…
27.3.25	RNA.regulation of transcription.MYB domain transcription factor family	psme_t074513	(loc_os09g15800.1 : 268.0) no description available & (at2g22070 : 267.0) pentatricopeptide (PPR) repeat-containing protein; CONTAINS InterPro DOMAIN/s: Pentatricopeptide repeat (InterPro:IPR002885); BEST Arabidopsis thaliana protein match is: Pentatricopeptide repeat (PPR) superfamily protein (TAIR:AT1G25360.1); Has 47939 Blast hits to 14346 proteins in 287 species: Archae - 0; Bacteria - 20; Me…
27.3.25	RNA.regulation of transcription.MYB domain transcription factor family	psme_t077157	(loc_os09g15800.1 : 247.0) no description available & (at4g02750 : 242.0) Tetratricopeptide repeat (TPR)-like superfamily protein; LOCATED IN: mitochondrion; EXPRESSED IN: 16 plant structures; EXPRESSED DURING: 7 growth stages; CONTAINS InterPro DOMAIN/s: Pentatricopeptide repeat (InterPro:IPR002885); BEST Arabidopsis thaliana protein match is: pentatricopeptide (PPR) repeat-containing protein (T…
27.3.25	RNA.regulation of transcription.MYB domain transcription factor family	psme_t077434	(at2g13600 : 186.0) Pentatricopeptide repeat (PPR) superfamily protein; CONTAINS InterPro DOMAIN/s: Pentatricopeptide repeat (InterPro:IPR002885); BEST Arabidopsis thaliana protein match is: pentatricopeptide (PPR) repeat-containing protein (TAIR:AT2G22070.1); Has 46660 Blast hits to 13875 proteins in 226 species: Archae - 0; Bacteria - 4; Metazoa - 74; Fungi - 58; Plants - 45878; Viruses - 0; Ot…
27.3.25	RNA.regulation of transcription.MYB domain transcription factor family	psme_t082420	(at2g22070 : 231.0) pentatricopeptide (PPR) repeat-containing protein; CONTAINS InterPro DOMAIN/s: Pentatricopeptide repeat (InterPro:IPR002885); BEST Arabidopsis thaliana protein match is: Pentatricopeptide repeat (PPR) superfamily protein (TAIR:AT1G25360.1); Has 47939 Blast hits to 14346 proteins in 287 species: Archae - 0; Bacteria - 20; Metazoa - 98; Fungi - 122; Plants - 46979; Viruses - 0; …
27.3.25	RNA.regulation of transcription.MYB domain transcription factor family	psme_t088980	(loc_os12g07640.1 : 152.0) no description available & (at4g38620 : 151.0) Encodes a R2R3 MYB protein which is involved in the response to UV-B. It functions as a repressor of target gene expression. One of its target genes encodes cinnamate 4-hydroxylase; mutants accumulate sinapate esters in their leaves. MYB4 binds to its own promoter and represses its own expression. Nuclear localization of MY…
27.3.25	RNA.regulation of transcription.MYB domain transcription factor family	psme_t090856	(loc_os12g07640.1 : 99.4) no description available & (at4g38620 : 99.0) Encodes a R2R3 MYB protein which is involved in the response to UV-B. It functions as a repressor of target gene expression. One of its target genes encodes cinnamate 4-hydroxylase; mutants accumulate sinapate esters in their leaves. MYB4 binds to its own promoter and represses its own expression. Nuclear localization of MYB4…
27.3.25	RNA.regulation of transcription.MYB domain transcription factor family	psme_t106657	(loc_os02g05720.1 : 179.0) no description available & (at2g22070 : 170.0) pentatricopeptide (PPR) repeat-containing protein; CONTAINS InterPro DOMAIN/s: Pentatricopeptide repeat (InterPro:IPR002885); BEST Arabidopsis thaliana protein match is: Pentatricopeptide repeat (PPR) superfamily protein (TAIR:AT1G25360.1); Has 47939 Blast hits to 14346 proteins in 287 species: Archae - 0; Bacteria - 20; Me…
27.3.25	RNA.regulation of transcription.MYB domain transcription factor family	psme_t107043	(at3g57430 : 206.0) Encodes a chloroplast RNA editing factor.; ORGANELLE TRANSCRIPT PROCESSING 84 (OTP84); CONTAINS InterPro DOMAIN/s: Pentatricopeptide repeat (InterPro:IPR002885); BEST Arabidopsis thaliana protein match is: Pentatricopeptide repeat (PPR) superfamily protein (TAIR:AT1G11290.1); Has 46517 Blast hits to 13331 proteins in 240 species: Archae - 0; Bacteria - 7; Metazoa - 55; Fungi -…
27.3.25	RNA.regulation of transcription.MYB domain transcription factor family	psme_t117605	(loc_os09g15800.1 : 171.0) no description available & (at4g02750 : 165.0) Tetratricopeptide repeat (TPR)-like superfamily protein; LOCATED IN: mitochondrion; EXPRESSED IN: 16 plant structures; EXPRESSED DURING: 7 growth stages; CONTAINS InterPro DOMAIN/s: Pentatricopeptide repeat (InterPro:IPR002885); BEST Arabidopsis thaliana protein match is: pentatricopeptide (PPR) repeat-containing protein (T…
27.3.25	RNA.regulation of transcription.MYB domain transcription factor family	psme_t127774	(loc_os10g40920.1 : 134.0) no description available & (at4g18750 : 127.0) Encodes a pentatricopeptide (PPR) protein involved in leaf and root development. dot4 mutants have an aberrant midgap venation pattern in juvenile leaves and cotyledons.; DEFECTIVELY ORGANIZED TRIBUTARIES 4 (DOT4); INVOLVED IN: cotyledon vascular tissue pattern formation, phloem or xylem histogenesis, leaf vascular tissue p…
27.3.25	RNA.regulation of transcription.MYB domain transcription factor family	psme_t138102	(loc_os09g15800.1 : 167.0) no description available & (at1g25360 : 152.0) Pentatricopeptide repeat (PPR) superfamily protein; FUNCTIONS IN: molecular_function unknown; INVOLVED IN: biological_process unknown; LOCATED IN: cellular_component unknown; EXPRESSED IN: 16 plant structures; EXPRESSED DURING: 9 growth stages; CONTAINS InterPro DOMAIN/s: Pentatricopeptide repeat (InterPro:IPR002885); BEST …
27.3.25	RNA.regulation of transcription.MYB domain transcription factor family	psme_t157721	(loc_os07g02280.1 : 138.0) no description available & (at4g37380 : 132.0) Tetratricopeptide repeat (TPR)-like superfamily protein; CONTAINS InterPro DOMAIN/s: Pentatricopeptide repeat (InterPro:IPR002885); BEST Arabidopsis thaliana protein match is: Tetratricopeptide repeat (TPR)-like superfamily protein (TAIR:AT5G66520.1); Has 33786 Blast hits to 13504 proteins in 252 species: Archae - 0; Bacter…
27.3.26	RNA.regulation of transcription.MYB-related transcription factor family	psme_t028135	(at4g39250 : 102.0) RAD-like 1 (RL1); CONTAINS InterPro DOMAIN/s: Molecular chaperone, heat shock protein, Hsp40, DnaJ (InterPro:IPR015609), SANT, DNA-binding (InterPro:IPR001005), Myb, DNA-binding (InterPro:IPR014778), Homeodomain-like (InterPro:IPR009057), SANT, eukarya (InterPro:IPR017884); BEST Arabidopsis thaliana protein match is: Homeodomain-like superfamily protein (TAIR:AT2G21650.1); Has…
27.3.26	RNA.regulation of transcription.MYB-related transcription factor family	psme_t033080	(at4g39250 : 105.0) RAD-like 1 (RL1); CONTAINS InterPro DOMAIN/s: Molecular chaperone, heat shock protein, Hsp40, DnaJ (InterPro:IPR015609), SANT, DNA-binding (InterPro:IPR001005), Myb, DNA-binding (InterPro:IPR014778), Homeodomain-like (InterPro:IPR009057), SANT, eukarya (InterPro:IPR017884); BEST Arabidopsis thaliana protein match is: Homeodomain-like superfamily protein (TAIR:AT2G21650.1); Has…
27.3.26	RNA.regulation of transcription.MYB-related transcription factor family	psme_t035061	(at4g39250 : 106.0) RAD-like 1 (RL1); CONTAINS InterPro DOMAIN/s: Molecular chaperone, heat shock protein, Hsp40, DnaJ (InterPro:IPR015609), SANT, DNA-binding (InterPro:IPR001005), Myb, DNA-binding (InterPro:IPR014778), Homeodomain-like (InterPro:IPR009057), SANT, eukarya (InterPro:IPR017884); BEST Arabidopsis thaliana protein match is: Homeodomain-like superfamily protein (TAIR:AT2G21650.1); Has…
27.3.27	RNA.regulation of transcription.NAC domain transcription factor family	psme_t014964	(q52qh4|nac68_orysa : 132.0) NAC domain-containing protein 68 (ONAC068) - Oryza sativa (Rice) & (loc_os01g60020.1 : 132.0) no description available & (at1g01720 : 117.0) Belongs to a large family of putative transcriptional activators with NAC domain. Transcript level increases in response to wounding and abscisic acid. ATAF1 attentuates ABA signaling and sythesis. Mutants are hyposensitive to AB…
27.3.27	RNA.regulation of transcription.NAC domain transcription factor family	psme_t019952	(q52qh4|nac68_orysa : 259.0) NAC domain-containing protein 68 (ONAC068) - Oryza sativa (Rice) & (loc_os01g60020.1 : 259.0) no description available & (at1g01720 : 248.0) Belongs to a large family of putative transcriptional activators with NAC domain. Transcript level increases in response to wounding and abscisic acid. ATAF1 attentuates ABA signaling and sythesis. Mutants are hyposensitive to AB…
27.3.27	RNA.regulation of transcription.NAC domain transcription factor family	psme_t021123	(q52qh4|nac68_orysa : 294.0) NAC domain-containing protein 68 (ONAC068) - Oryza sativa (Rice) & (loc_os01g60020.1 : 294.0) no description available & (at1g01720 : 283.0) Belongs to a large family of putative transcriptional activators with NAC domain. Transcript level increases in response to wounding and abscisic acid. ATAF1 attentuates ABA signaling and sythesis. Mutants are hyposensitive to AB…
27.3.27	RNA.regulation of transcription.NAC domain transcription factor family	psme_t022990	(loc_os03g21060.1 : 248.0) no description available & (at1g52880 : 241.0) Transcription factor with a NAC domain. Homologous to the petunia gene NAM which is required for the development of the shoot. Expressed in the embryo.; NO APICAL MERISTEM (NAM); FUNCTIONS IN: sequence-specific DNA binding transcription factor activity; INVOLVED IN: multicellular organismal development, regulation of transc…
27.3.27	RNA.regulation of transcription.NAC domain transcription factor family	psme_t026247	(at5g53950 : 271.0) Transcriptional activator of the NAC gene family, with CUC1 redundantly required for embryonic apical meristem formation, cotyledon separation and expression of STM. Proper timing of CUC2 expression is required to maintain the phyllotactic pattern initiated in the meristem. CUC2 expression in leaf sinus region is required for serration and the extent of serration is modulated …
27.3.27	RNA.regulation of transcription.NAC domain transcription factor family	psme_t035829	(loc_os03g21060.1 : 239.0) no description available & (at1g52880 : 234.0) Transcription factor with a NAC domain. Homologous to the petunia gene NAM which is required for the development of the shoot. Expressed in the embryo.; NO APICAL MERISTEM (NAM); FUNCTIONS IN: sequence-specific DNA binding transcription factor activity; INVOLVED IN: multicellular organismal development, regulation of transc…
27.3.27	RNA.regulation of transcription.NAC domain transcription factor family	psme_t066724	(loc_os03g02800.1 : 290.0) no description available & (at1g65910 : 276.0) NAC domain containing protein 28 (NAC028); FUNCTIONS IN: sequence-specific DNA binding transcription factor activity; INVOLVED IN: multicellular organismal development, regulation of transcription; LOCATED IN: cellular_component unknown; EXPRESSED IN: 19 plant structures; EXPRESSED DURING: 10 growth stages; CONTAINS InterPr…
27.3.29	RNA.regulation of transcription.TCP transcription factor family	psme_t030796	(at3g02150 : 102.0) a chloroplast trans-acting factor of the psbD light-responsive promoter.TCP gene involved in heterochronic control of leaf differentiation.; plastid transcription factor 1 (PTF1); FUNCTIONS IN: sequence-specific DNA binding transcription factor activity; INVOLVED IN: cell differentiation, positive regulation of development, heterochronic, regulation of transcription, leaf morp…
27.3.32	RNA.regulation of transcription.WRKY domain transcription factor family	psme_t006051	(at4g22070 : 280.0) member of WRKY Transcription Factor; Group II-b; WRKY DNA-binding protein 31 (WRKY31); CONTAINS InterPro DOMAIN/s: DNA-binding WRKY (InterPro:IPR003657); BEST Arabidopsis thaliana protein match is: WRKY family transcription factor (TAIR:AT4G04450.1); Has 30201 Blast hits to 17322 proteins in 780 species: Archae - 12; Bacteria - 1396; Metazoa - 17338; Fungi - 3422; Plants - 503…
27.3.32	RNA.regulation of transcription.WRKY domain transcription factor family	psme_t009327	(loc_os01g14440.1 : 269.0) no description available & (at4g22070 : 263.0) member of WRKY Transcription Factor; Group II-b; WRKY DNA-binding protein 31 (WRKY31); CONTAINS InterPro DOMAIN/s: DNA-binding WRKY (InterPro:IPR003657); BEST Arabidopsis thaliana protein match is: WRKY family transcription factor (TAIR:AT4G04450.1); Has 30201 Blast hits to 17322 proteins in 780 species: Archae - 12; Bacter…
27.3.32	RNA.regulation of transcription.WRKY domain transcription factor family	psme_t011683	(loc_os04g50920.1 : 191.0) no description available & (at2g34830 : 184.0) member of WRKY Transcription Factor; Group II-e; WRKY DNA-binding protein 35 (WRKY35); CONTAINS InterPro DOMAIN/s: DNA-binding WRKY (InterPro:IPR003657), Transcription factor, WRKY group Iie (InterPro:IPR017412); BEST Arabidopsis thaliana protein match is: WRKY DNA-binding protein 14 (TAIR:AT1G30650.1); Has 5047 Blast hits …
27.3.32	RNA.regulation of transcription.WRKY domain transcription factor family	psme_t013173	(loc_os05g25700.1 : 115.0) no description available & (at4g11070 : 110.0) member of WRKY Transcription Factor; Group III; WRKY41; FUNCTIONS IN: sequence-specific DNA binding transcription factor activity; INVOLVED IN: regulation of transcription, DNA-dependent, regulation of transcription; CONTAINS InterPro DOMAIN/s: DNA-binding WRKY (InterPro:IPR003657); BEST Arabidopsis thaliana protein match i…
27.3.32	RNA.regulation of transcription.WRKY domain transcription factor family	psme_t021593	(at4g23810 : 118.0) member of WRKY Transcription Factor; Group III; WRKY53; FUNCTIONS IN: protein binding, DNA binding, transcription activator activity, sequence-specific DNA binding transcription factor activity; INVOLVED IN: in 6 processes; LOCATED IN: nucleus, chloroplast; EXPRESSED IN: 20 plant structures; EXPRESSED DURING: 12 growth stages; CONTAINS InterPro DOMAIN/s: DNA-binding WRKY (Inte…
27.3.32	RNA.regulation of transcription.WRKY domain transcription factor family	psme_t022604	(loc_os06g05380.1 : 163.0) no description available & (at5g15130 : 162.0) member of WRKY Transcription Factor; Group II-b; contribute to basal immunity.; WRKY DNA-binding protein 72 (WRKY72); CONTAINS InterPro DOMAIN/s: DNA-binding WRKY (InterPro:IPR003657); BEST Arabidopsis thaliana protein match is: WRKY DNA-binding protein 61 (TAIR:AT1G18860.1); Has 6758 Blast hits to 4151 proteins in 378 spec…
27.3.32	RNA.regulation of transcription.WRKY domain transcription factor family	psme_t025160	(at1g62300 : 180.0) Encodes a transcription factor WRKY6. Regulates Phosphate1 (Pho1) expression in response to low phosphate (Pi) stress.; WRKY6; CONTAINS InterPro DOMAIN/s: DNA-binding WRKY (InterPro:IPR003657); BEST Arabidopsis thaliana protein match is: WRKY family transcription factor (TAIR:AT4G04450.1); Has 3824 Blast hits to 3363 proteins in 295 species: Archae - 0; Bacteria - 33; Metazoa …
27.3.32	RNA.regulation of transcription.WRKY domain transcription factor family	psme_t025484	(loc_os05g49210.1 : 165.0) no description available & (at4g04450 : 164.0) member of WRKY Transcription Factor; Group II-b; WRKY42; CONTAINS InterPro DOMAIN/s: DNA-binding WRKY (InterPro:IPR003657); BEST Arabidopsis thaliana protein match is: WRKY DNA-binding protein 31 (TAIR:AT4G22070.1); Has 3599 Blast hits to 3152 proteins in 220 species: Archae - 0; Bacteria - 6; Metazoa - 41; Fungi - 2; Plant…
27.3.32	RNA.regulation of transcription.WRKY domain transcription factor family	psme_t025840	(at4g22070 : 173.0) member of WRKY Transcription Factor; Group II-b; WRKY DNA-binding protein 31 (WRKY31); CONTAINS InterPro DOMAIN/s: DNA-binding WRKY (InterPro:IPR003657); BEST Arabidopsis thaliana protein match is: WRKY family transcription factor (TAIR:AT4G04450.1); Has 30201 Blast hits to 17322 proteins in 780 species: Archae - 12; Bacteria - 1396; Metazoa - 17338; Fungi - 3422; Plants - 503…
27.3.32	RNA.regulation of transcription.WRKY domain transcription factor family	psme_t027056	(loc_os01g14440.1 : 136.0) no description available & (at4g01720 : 133.0) member of WRKY Transcription Factor; Group II-b; WRKY47; CONTAINS InterPro DOMAIN/s: DNA-binding WRKY (InterPro:IPR003657); BEST Arabidopsis thaliana protein match is: WRKY family transcription factor (TAIR:AT4G04450.1); Has 3605 Blast hits to 3148 proteins in 215 species: Archae - 2; Bacteria - 4; Metazoa - 47; Fungi - 10;…
27.3.32	RNA.regulation of transcription.WRKY domain transcription factor family	psme_t028122	(at2g30590 : 87.8) Encodes WRKY DNA-binding protein 21 (WRKY21).; WRKY DNA-binding protein 21 (WRKY21); FUNCTIONS IN: calmodulin binding, sequence-specific DNA binding transcription factor activity; INVOLVED IN: regulation of transcription, DNA-dependent, regulation of transcription; LOCATED IN: nucleus; EXPRESSED IN: 22 plant structures; EXPRESSED DURING: 13 growth stages; CONTAINS InterPro DOMA…
27.3.32	RNA.regulation of transcription.WRKY domain transcription factor family	psme_t028189	(at1g62300 : 157.0) Encodes a transcription factor WRKY6. Regulates Phosphate1 (Pho1) expression in response to low phosphate (Pi) stress.; WRKY6; CONTAINS InterPro DOMAIN/s: DNA-binding WRKY (InterPro:IPR003657); BEST Arabidopsis thaliana protein match is: WRKY family transcription factor (TAIR:AT4G04450.1); Has 3824 Blast hits to 3363 proteins in 295 species: Archae - 0; Bacteria - 33; Metazoa …
27.3.32	RNA.regulation of transcription.WRKY domain transcription factor family	psme_t032054	(loc_os12g40570.2 : 159.0) no description available & (at2g30590 : 157.0) Encodes WRKY DNA-binding protein 21 (WRKY21).; WRKY DNA-binding protein 21 (WRKY21); FUNCTIONS IN: calmodulin binding, sequence-specific DNA binding transcription factor activity; INVOLVED IN: regulation of transcription, DNA-dependent, regulation of transcription; LOCATED IN: nucleus; EXPRESSED IN: 22 plant structures; EXP…
27.3.32	RNA.regulation of transcription.WRKY domain transcription factor family	psme_t035090	(at1g62300 : 147.0) Encodes a transcription factor WRKY6. Regulates Phosphate1 (Pho1) expression in response to low phosphate (Pi) stress.; WRKY6; CONTAINS InterPro DOMAIN/s: DNA-binding WRKY (InterPro:IPR003657); BEST Arabidopsis thaliana protein match is: WRKY family transcription factor (TAIR:AT4G04450.1); Has 3824 Blast hits to 3363 proteins in 295 species: Archae - 0; Bacteria - 33; Metazoa …
27.3.32	RNA.regulation of transcription.WRKY domain transcription factor family	psme_t043979	(at1g62300 : 148.0) Encodes a transcription factor WRKY6. Regulates Phosphate1 (Pho1) expression in response to low phosphate (Pi) stress.; WRKY6; CONTAINS InterPro DOMAIN/s: DNA-binding WRKY (InterPro:IPR003657); BEST Arabidopsis thaliana protein match is: WRKY family transcription factor (TAIR:AT4G04450.1); Has 3824 Blast hits to 3363 proteins in 295 species: Archae - 0; Bacteria - 33; Metazoa …
27.3.35	RNA.regulation of transcription.bZIP transcription factor family	psme_t033477	(at2g42380 : 173.0) Encodes a member of the BZIP family of transcription factors. Forms heterodimers with the related protein AtbZIP61. Binds to G-boxes in vitro and is localized to the nucleus in onion epidermal cells.; BZIP34; FUNCTIONS IN: DNA binding, transcription activator activity, sequence-specific DNA binding transcription factor activity; INVOLVED IN: regulation of transcription, DNA-de…
27.3.35	RNA.regulation of transcription.bZIP transcription factor family	psme_t035934	(at3g30530 : 101.0) basic leucine-zipper 42 (bZIP42); FUNCTIONS IN: DNA binding, protein homodimerization activity, protein heterodimerization activity, sequence-specific DNA binding transcription factor activity; INVOLVED IN: regulation of transcription, DNA-dependent; EXPRESSED IN: inflorescence meristem, flower; EXPRESSED DURING: petal differentiation and expansion stage; CONTAINS InterPro DOM…
27.3.35	RNA.regulation of transcription.bZIP transcription factor family	psme_t041201	(at3g30530 : 106.0) basic leucine-zipper 42 (bZIP42); FUNCTIONS IN: DNA binding, protein homodimerization activity, protein heterodimerization activity, sequence-specific DNA binding transcription factor activity; INVOLVED IN: regulation of transcription, DNA-dependent; EXPRESSED IN: inflorescence meristem, flower; EXPRESSED DURING: petal differentiation and expansion stage; CONTAINS InterPro DOM…
27.3.37	RNA.regulation of transcription.AS2,Lateral Organ Boundaries Gene Family	psme_t014415	(at1g67100 : 203.0) LOB domain-containing protein 40 (LBD40); CONTAINS InterPro DOMAIN/s: Lateral organ boundaries, LOB (InterPro:IPR004883); BEST Arabidopsis thaliana protein match is: LOB domain-containing protein 41 (TAIR:AT3G02550.1); Has 635 Blast hits to 634 proteins in 26 species: Archae - 0; Bacteria - 0; Metazoa - 0; Fungi - 0; Plants - 635; Viruses - 0; Other Eukaryotes - 0 (source: NCB…
27.3.37	RNA.regulation of transcription.AS2,Lateral Organ Boundaries Gene Family	psme_t026781	(at2g30130 : 93.6) Overexpression/activation tagged allele has epinastic leaves, reduced apical dominance and is sterile. Gene is similar to asymmetric leaves (AS)/lateral organ boundary (LOB) genes which repress KNOX gene expression.; ASL5; CONTAINS InterPro DOMAIN/s: Lateral organ boundaries, LOB (InterPro:IPR004883); BEST Arabidopsis thaliana protein match is: LOB domain-containing protein 11 …
27.3.37	RNA.regulation of transcription.AS2,Lateral Organ Boundaries Gene Family	psme_t047735	(at1g67100 : 179.0) LOB domain-containing protein 40 (LBD40); CONTAINS InterPro DOMAIN/s: Lateral organ boundaries, LOB (InterPro:IPR004883); BEST Arabidopsis thaliana protein match is: LOB domain-containing protein 41 (TAIR:AT3G02550.1); Has 635 Blast hits to 634 proteins in 26 species: Archae - 0; Bacteria - 0; Metazoa - 0; Fungi - 0; Plants - 635; Viruses - 0; Other Eukaryotes - 0 (source: NCB…
27.3.40	RNA.regulation of transcription.Aux/IAA family	psme_t019658	(at2g33310 : 157.0) Auxin induced gene, IAA13 (IAA13).; auxin-induced protein 13 (IAA13); FUNCTIONS IN: sequence-specific DNA binding transcription factor activity; INVOLVED IN: response to auxin stimulus, response to cyclopentenone; LOCATED IN: nucleus; EXPRESSED IN: 22 plant structures; EXPRESSED DURING: 13 growth stages; CONTAINS InterPro DOMAIN/s: Aux/IAA-ARF-dimerisation (InterPro:IPR011525)…
27.3.40	RNA.regulation of transcription.Aux/IAA family	psme_t027622	(p0c132|iaa30_orysa : 248.0) Auxin-responsive protein IAA30 (Indoleacetic acid-induced protein 30) - Oryza sativa (Rice) & (loc_os12g40890.1 : 248.0) no description available & (at5g65670 : 232.0) auxin (indole-3-acetic acid) induced gene; indole-3-acetic acid inducible 9 (IAA9); CONTAINS InterPro DOMAIN/s: Aux/IAA-ARF-dimerisation (InterPro:IPR011525), AUX/IAA protein (InterPro:IPR003311); BEST …
27.3.40	RNA.regulation of transcription.Aux/IAA family	psme_t059229	(at4g14550 : 177.0) IAA14 is a member of the Aux/IAA protein family. Involved in lateral root development. Gain of function mutation decreases auxin-inducible gene expression. Protein is localized to the nucleus. Expressed in stele and root tip epidermis. Functions as a negative regulator of ARF7/19.; indole-3-acetic acid inducible 14 (IAA14); CONTAINS InterPro DOMAIN/s: Aux/IAA-ARF-dimerisation …
27.3.44	RNA.regulation of transcription.Chromatin Remodeling Factors	psme_t035349	(at4g22140 : 270.0) EARLY BOLTING IN SHORT DAYS (EBS); FUNCTIONS IN: DNA binding, zinc ion binding; INVOLVED IN: positive regulation of flower development, regulation of transcription, DNA-dependent, seed germination; LOCATED IN: cellular_component unknown; EXPRESSED IN: 23 plant structures; EXPRESSED DURING: 13 growth stages; CONTAINS InterPro DOMAIN/s: Zinc finger, PHD-type, conserved site (Int…
27.3.46	RNA.regulation of transcription.DNA methyltransferases	psme_t022859	(at1g80740 : 82.8) ecotype Kl-0 chromomethylase (CMT1). A plant line expressing an RNAi construct directed against DMT4 has reduced agrobacterium-mediated tumor formation.; chromomethylase 1 (CMT1); FUNCTIONS IN: chromatin binding, DNA binding; INVOLVED IN: DNA mediated transformation, DNA methylation; LOCATED IN: chromatin, nucleus; CONTAINS InterPro DOMAIN/s: Chromo domain subgroup (InterPro:IP…
27.3.54	RNA.regulation of transcription.Histone acetyltransferases	psme_t054011	(at1g79000 : 498.0) Homologous to CREB-binding protein, a co-activator of transcription with histone acetyl-transferase activity. No single prior lysine acetylation is sufficient to block HAC1 acetylation of the H3 or H4 peptides, suggesting that HAC1, HAC5, and HAC12 can acetylate any of several lysines present in the peptides. HAM2 acetylates histone H4 lysine 5. A plant line expressing an RNAi…
27.3.55	RNA.regulation of transcription.HDA	psme_t046963	(at3g18520 : 112.0) Encodes a protein with similarity to histone deacetylases. Plants expressing RNAi directed against this gene show a moderate resistance to agrobacterium-mediated root transformation.; histone deacetylase 15 (HDA15); FUNCTIONS IN: histone deacetylase activity; INVOLVED IN: DNA mediated transformation, histone deacetylation; LOCATED IN: intracellular; EXPRESSED IN: 25 plant stru…
27.3.57	RNA.regulation of transcription.JUMONJI family	psme_t000374	(at5g46910 : 641.0) Transcription factor jumonji (jmj) family protein / zinc finger (C5HC2 type) family protein; FUNCTIONS IN: sequence-specific DNA binding transcription factor activity; INVOLVED IN: response to chitin, regulation of transcription; LOCATED IN: nucleus; EXPRESSED IN: 24 plant structures; EXPRESSED DURING: 14 growth stages; CONTAINS InterPro DOMAIN/s: Transcription factor jumonji/…
27.3.57	RNA.regulation of transcription.JUMONJI family	psme_t004682	(loc_os10g42690.1 : 454.0) no description available & (at5g46910 : 452.0) Transcription factor jumonji (jmj) family protein / zinc finger (C5HC2 type) family protein; FUNCTIONS IN: sequence-specific DNA binding transcription factor activity; INVOLVED IN: response to chitin, regulation of transcription; LOCATED IN: nucleus; EXPRESSED IN: 24 plant structures; EXPRESSED DURING: 14 growth stages; CON…
27.3.57	RNA.regulation of transcription.JUMONJI family	psme_t006325	(at5g46910 : 600.0) Transcription factor jumonji (jmj) family protein / zinc finger (C5HC2 type) family protein; FUNCTIONS IN: sequence-specific DNA binding transcription factor activity; INVOLVED IN: response to chitin, regulation of transcription; LOCATED IN: nucleus; EXPRESSED IN: 24 plant structures; EXPRESSED DURING: 14 growth stages; CONTAINS InterPro DOMAIN/s: Transcription factor jumonji/…
27.3.57	RNA.regulation of transcription.JUMONJI family	psme_t007014	(loc_os10g42690.1 : 494.0) no description available & (at5g46910 : 492.0) Transcription factor jumonji (jmj) family protein / zinc finger (C5HC2 type) family protein; FUNCTIONS IN: sequence-specific DNA binding transcription factor activity; INVOLVED IN: response to chitin, regulation of transcription; LOCATED IN: nucleus; EXPRESSED IN: 24 plant structures; EXPRESSED DURING: 14 growth stages; CON…
27.3.57	RNA.regulation of transcription.JUMONJI family	psme_t007183	(loc_os10g42690.1 : 494.0) no description available & (at5g46910 : 492.0) Transcription factor jumonji (jmj) family protein / zinc finger (C5HC2 type) family protein; FUNCTIONS IN: sequence-specific DNA binding transcription factor activity; INVOLVED IN: response to chitin, regulation of transcription; LOCATED IN: nucleus; EXPRESSED IN: 24 plant structures; EXPRESSED DURING: 14 growth stages; CON…
27.3.64	RNA.regulation of transcription.PHOR1	psme_t009961	(at3g49810 : 445.0) ARM repeat superfamily protein; FUNCTIONS IN: ubiquitin-protein ligase activity, binding; INVOLVED IN: protein ubiquitination; LOCATED IN: ubiquitin ligase complex; EXPRESSED IN: 22 plant structures; EXPRESSED DURING: 13 growth stages; CONTAINS InterPro DOMAIN/s: U box domain (InterPro:IPR003613), Armadillo-like helical (InterPro:IPR011989), Armadillo-type fold (InterPro:IPR01…
27.3.64	RNA.regulation of transcription.PHOR1	psme_t018244	(at3g19380 : 246.0) plant U-box 25 (PUB25); FUNCTIONS IN: ubiquitin-protein ligase activity, binding; INVOLVED IN: response to chitin; LOCATED IN: ubiquitin ligase complex; EXPRESSED IN: 22 plant structures; EXPRESSED DURING: 12 growth stages; CONTAINS InterPro DOMAIN/s: U box domain (InterPro:IPR003613), Armadillo-like helical (InterPro:IPR011989), Armadillo-type fold (InterPro:IPR016024); BEST …
27.3.64	RNA.regulation of transcription.PHOR1	psme_t019390	(loc_os03g13740.1 : 217.0) no description available & (at3g19380 : 216.0) plant U-box 25 (PUB25); FUNCTIONS IN: ubiquitin-protein ligase activity, binding; INVOLVED IN: response to chitin; LOCATED IN: ubiquitin ligase complex; EXPRESSED IN: 22 plant structures; EXPRESSED DURING: 12 growth stages; CONTAINS InterPro DOMAIN/s: U box domain (InterPro:IPR003613), Armadillo-like helical (InterPro:IPR01…
27.3.64	RNA.regulation of transcription.PHOR1	psme_t021160	(loc_os03g13740.1 : 200.0) no description available & (at2g35930 : 181.0) Encodes a cytoplasmically localized U-box domain containing E3 ubiquitin ligase that is involved in the response to water stress and acts as a negative regulator of PAMP-triggered immunity.; plant U-box 23 (PUB23); CONTAINS InterPro DOMAIN/s: U box domain (InterPro:IPR003613), Armadillo-like helical (InterPro:IPR011989), Ar…
27.3.64	RNA.regulation of transcription.PHOR1	psme_t021449	(at3g19380 : 258.0) plant U-box 25 (PUB25); FUNCTIONS IN: ubiquitin-protein ligase activity, binding; INVOLVED IN: response to chitin; LOCATED IN: ubiquitin ligase complex; EXPRESSED IN: 22 plant structures; EXPRESSED DURING: 12 growth stages; CONTAINS InterPro DOMAIN/s: U box domain (InterPro:IPR003613), Armadillo-like helical (InterPro:IPR011989), Armadillo-type fold (InterPro:IPR016024); BEST …
27.3.67	RNA.regulation of transcription.putative transcription regulator	psme_t001929	(loc_os08g19870.1 : 457.0) no description available & (at3g17450 : 229.0) hAT dimerisation domain-containing protein; FUNCTIONS IN: protein dimerization activity, DNA binding; INVOLVED IN: biological_process unknown; LOCATED IN: cellular_component unknown; EXPRESSED IN: 22 plant structures; EXPRESSED DURING: 14 growth stages; CONTAINS InterPro DOMAIN/s: HAT dimerisation (InterPro:IPR008906), Zinc…
27.3.67	RNA.regulation of transcription.putative transcription regulator	psme_t002485	(loc_os10g29560.1 : 445.0) no description available & (at5g47430 : 434.0) DWNN domain, a CCHC-type zinc finger; FUNCTIONS IN: zinc ion binding; INVOLVED IN: biological_process unknown; LOCATED IN: nucleus; EXPRESSED IN: 24 plant structures; EXPRESSED DURING: 14 growth stages; CONTAINS InterPro DOMAIN/s: DWNN domain (InterPro:IPR014891); BEST Arabidopsis thaliana protein match is: DWNN domain, a C…
27.3.67	RNA.regulation of transcription.putative transcription regulator	psme_t002673	(loc_os10g29560.1 : 567.0) no description available & (at5g47430 : 529.0) DWNN domain, a CCHC-type zinc finger; FUNCTIONS IN: zinc ion binding; INVOLVED IN: biological_process unknown; LOCATED IN: nucleus; EXPRESSED IN: 24 plant structures; EXPRESSED DURING: 14 growth stages; CONTAINS InterPro DOMAIN/s: DWNN domain (InterPro:IPR014891); BEST Arabidopsis thaliana protein match is: DWNN domain, a C…
27.3.67	RNA.regulation of transcription.putative transcription regulator	psme_t004545	(at5g47430 : 89.0) DWNN domain, a CCHC-type zinc finger; FUNCTIONS IN: zinc ion binding; INVOLVED IN: biological_process unknown; LOCATED IN: nucleus; EXPRESSED IN: 24 plant structures; EXPRESSED DURING: 14 growth stages; CONTAINS InterPro DOMAIN/s: DWNN domain (InterPro:IPR014891); BEST Arabidopsis thaliana protein match is: DWNN domain, a CCHC-type zinc finger (TAIR:AT4G17410.1). & (loc_os10g29…
27.3.67	RNA.regulation of transcription.putative transcription regulator	psme_t010307	(at1g19340 : 256.0) Methyltransferase MT-A70 family protein; FUNCTIONS IN: S-adenosylmethionine-dependent methyltransferase activity, methyltransferase activity, nucleic acid binding; INVOLVED IN: methylation, nucleobase, nucleoside, nucleotide and nucleic acid metabolic process; LOCATED IN: cellular_component unknown; EXPRESSED IN: 9 plant structures; EXPRESSED DURING: 4 anthesis, petal differen…
27.3.67	RNA.regulation of transcription.putative transcription regulator	psme_t010413	(loc_os01g12280.2 : 145.0) no description available & (at3g17450 : 132.0) hAT dimerisation domain-containing protein; FUNCTIONS IN: protein dimerization activity, DNA binding; INVOLVED IN: biological_process unknown; LOCATED IN: cellular_component unknown; EXPRESSED IN: 22 plant structures; EXPRESSED DURING: 14 growth stages; CONTAINS InterPro DOMAIN/s: HAT dimerisation (InterPro:IPR008906), Zinc…
27.3.67	RNA.regulation of transcription.putative transcription regulator	psme_t012877	(at3g02400 : 97.8) SMAD/FHA domain-containing protein ; FUNCTIONS IN: DNA binding; INVOLVED IN: regulation of transcription, DNA-dependent; LOCATED IN: nucleus; EXPRESSED IN: 21 plant structures; EXPRESSED DURING: 11 growth stages; CONTAINS InterPro DOMAIN/s: AT hook, DNA-binding motif (InterPro:IPR017956), SMAD/FHA domain (InterPro:IPR008984), Forkhead-associated (FHA) domain (InterPro:IPR000253…
27.3.67	RNA.regulation of transcription.putative transcription regulator	psme_t013698	(loc_os08g06500.1 : 509.0) no description available & (at1g07590 : 492.0) Tetratricopeptide repeat (TPR)-like superfamily protein; INVOLVED IN: response to cadmium ion; LOCATED IN: mitochondrion; EXPRESSED IN: 12 plant structures; EXPRESSED DURING: 4 anthesis, F mature embryo stage, petal differentiation and expansion stage, E expanded cotyledon stage, D bilateral stage; CONTAINS InterPro DOMAIN/…
27.3.67	RNA.regulation of transcription.putative transcription regulator	psme_t018910	(at1g19340 : 336.0) Methyltransferase MT-A70 family protein; FUNCTIONS IN: S-adenosylmethionine-dependent methyltransferase activity, methyltransferase activity, nucleic acid binding; INVOLVED IN: methylation, nucleobase, nucleoside, nucleotide and nucleic acid metabolic process; LOCATED IN: cellular_component unknown; EXPRESSED IN: 9 plant structures; EXPRESSED DURING: 4 anthesis, petal differen…
27.3.67	RNA.regulation of transcription.putative transcription regulator	psme_t025983	(loc_os04g34720.1 : 132.0) no description available & (at2g19260 : 113.0) RING/FYVE/PHD zinc finger superfamily protein; FUNCTIONS IN: DNA binding, zinc ion binding; INVOLVED IN: regulation of transcription, DNA-dependent; LOCATED IN: cellular_component unknown; CONTAINS InterPro DOMAIN/s: Zinc finger, PHD-type, conserved site (InterPro:IPR019786), Zinc finger, PHD-type (InterPro:IPR001965), Zinc…
27.3.67	RNA.regulation of transcription.putative transcription regulator	psme_t032889	(loc_os02g25020.1 : 151.0) no description available & (at5g49700 : 144.0) Predicted AT-hook DNA-binding family protein; CONTAINS InterPro DOMAIN/s: Protein of unknown function DUF296 (InterPro:IPR005175), Predicted AT-hook DNA-binding (InterPro:IPR014476); BEST Arabidopsis thaliana protein match is: Predicted AT-hook DNA-binding family protein (TAIR:AT1G14490.1); Has 1807 Blast hits to 1807 prote…
27.3.69	RNA.regulation of transcription.SET-domain transcriptional regulator family	psme_t005260	(at2g18850 : 395.0) SET domain-containing protein; FUNCTIONS IN: molecular_function unknown; INVOLVED IN: biological_process unknown; EXPRESSED IN: 22 plant structures; EXPRESSED DURING: 13 growth stages; CONTAINS InterPro DOMAIN/s: SET domain (InterPro:IPR001214); BEST Arabidopsis thaliana protein match is: Rubisco methyltransferase family protein (TAIR:AT3G07670.1). & (loc_os08g14660.1 : 375.0)…
27.3.69	RNA.regulation of transcription.SET-domain transcriptional regulator family	psme_t007148	(at2g18850 : 402.0) SET domain-containing protein; FUNCTIONS IN: molecular_function unknown; INVOLVED IN: biological_process unknown; EXPRESSED IN: 22 plant structures; EXPRESSED DURING: 13 growth stages; CONTAINS InterPro DOMAIN/s: SET domain (InterPro:IPR001214); BEST Arabidopsis thaliana protein match is: Rubisco methyltransferase family protein (TAIR:AT3G07670.1). & (loc_os08g14660.1 : 385.0)…
27.3.69	RNA.regulation of transcription.SET-domain transcriptional regulator family	psme_t010582	(at2g18850 : 407.0) SET domain-containing protein; FUNCTIONS IN: molecular_function unknown; INVOLVED IN: biological_process unknown; EXPRESSED IN: 22 plant structures; EXPRESSED DURING: 13 growth stages; CONTAINS InterPro DOMAIN/s: SET domain (InterPro:IPR001214); BEST Arabidopsis thaliana protein match is: Rubisco methyltransferase family protein (TAIR:AT3G07670.1). & (loc_os08g14660.1 : 394.0)…
27.3.69	RNA.regulation of transcription.SET-domain transcriptional regulator family	psme_t012381	(at5g17240 : 241.0) SET domain group 40 (SDG40); CONTAINS InterPro DOMAIN/s: SET domain (InterPro:IPR001214); BEST Arabidopsis thaliana protein match is: SET domain-containing protein (TAIR:AT3G55080.1); Has 770 Blast hits to 763 proteins in 162 species: Archae - 0; Bacteria - 0; Metazoa - 214; Fungi - 160; Plants - 288; Viruses - 0; Other Eukaryotes - 108 (source: NCBI BLink). & (loc_os07g28840.…
27.3.69	RNA.regulation of transcription.SET-domain transcriptional regulator family	psme_t013484	(at2g18850 : 407.0) SET domain-containing protein; FUNCTIONS IN: molecular_function unknown; INVOLVED IN: biological_process unknown; EXPRESSED IN: 22 plant structures; EXPRESSED DURING: 13 growth stages; CONTAINS InterPro DOMAIN/s: SET domain (InterPro:IPR001214); BEST Arabidopsis thaliana protein match is: Rubisco methyltransferase family protein (TAIR:AT3G07670.1). & (loc_os08g14660.1 : 392.0)…
27.3.69	RNA.regulation of transcription.SET-domain transcriptional regulator family	psme_t014460	(at1g26760 : 359.0) SET domain protein 35 (SDG35); FUNCTIONS IN: binding; INVOLVED IN: biological_process unknown; EXPRESSED IN: 21 plant structures; EXPRESSED DURING: 12 growth stages; CONTAINS InterPro DOMAIN/s: SET domain (InterPro:IPR001214), Tetratricopeptide-like helical (InterPro:IPR011990), Tetratricopeptide repeat-containing (InterPro:IPR013026), Tetratricopeptide repeat (InterPro:IPR019…
27.3.75	RNA.regulation of transcription.GRP	psme_t030153	(loc_os03g46770.2 : 148.0) no description available & (p49310|grp1_sinal : 142.0) Glycine-rich RNA-binding protein GRP1A - Sinapis alba (White mustard) (Brassica hirta) & (at2g21660 : 138.0) Encodes a small glycine-rich RNA binding protein that is part of a negative-feedback loop through which AtGRP7 regulates the circadian oscillations of its own transcript. Gene expression is induced by cold. G…
27.3.80	RNA.regulation of transcription.zf-HD	psme_t018183	(loc_os09g29130.1 : 187.0) no description available & (at4g24660 : 176.0) homeobox protein 22 (HB22); CONTAINS InterPro DOMAIN/s: Homeobox domain, ZF-HD class (InterPro:IPR006455), ZF-HD homeobox protein, Cys/His-rich dimerisation domain (InterPro:IPR006456), Homeodomain-related (InterPro:IPR012287); BEST Arabidopsis thaliana protein match is: homeobox protein 25 (TAIR:AT5G65410.1); Has 493 Blast…
27.3.80	RNA.regulation of transcription.zf-HD	psme_t032391	(at3g28917 : 104.0) mini zinc finger 2 (MIF2); CONTAINS InterPro DOMAIN/s: ZF-HD homeobox protein, Cys/His-rich dimerisation domain (InterPro:IPR006456); BEST Arabidopsis thaliana protein match is: mini zinc finger (TAIR:AT1G18835.1); Has 35333 Blast hits to 34131 proteins in 2444 species: Archae - 798; Bacteria - 22429; Metazoa - 974; Fungi - 991; Plants - 531; Viruses - 0; Other Eukaryotes - 96…
27.3.80	RNA.regulation of transcription.zf-HD	psme_t045819	(at3g28917 : 101.0) mini zinc finger 2 (MIF2); CONTAINS InterPro DOMAIN/s: ZF-HD homeobox protein, Cys/His-rich dimerisation domain (InterPro:IPR006456); BEST Arabidopsis thaliana protein match is: mini zinc finger (TAIR:AT1G18835.1); Has 35333 Blast hits to 34131 proteins in 2444 species: Archae - 798; Bacteria - 22429; Metazoa - 974; Fungi - 991; Plants - 531; Viruses - 0; Other Eukaryotes - 96…
27.3.84	RNA.regulation of transcription.BBR/BPC	psme_t016967	(loc_os06g04010.2 : 221.0) no description available & (at5g42520 : 207.0) basic pentacysteine 6 (BPC6); FUNCTIONS IN: DNA binding, sequence-specific DNA binding transcription factor activity; INVOLVED IN: regulation of transcription, DNA-dependent; LOCATED IN: nucleus; EXPRESSED IN: 22 plant structures; EXPRESSED DURING: 13 growth stages; CONTAINS InterPro DOMAIN/s: GAGA binding-like (InterPro:IP…
27.3.99	RNA.regulation of transcription.unclassified	psme_t003787	(loc_os03g22830.2 : 189.0) no description available & (at2g40830 : 186.0) Encodes a putative RING-H2 finger protein RHC1a.; RING-H2 finger C1A (RHC1A); FUNCTIONS IN: zinc ion binding; LOCATED IN: cell wall; EXPRESSED IN: 22 plant structures; EXPRESSED DURING: 13 growth stages; CONTAINS InterPro DOMAIN/s: Zinc finger, RING-type (InterPro:IPR001841), Zinc finger, C3HC4 RING-type (InterPro:IPR018957…
27.3.99	RNA.regulation of transcription.unclassified	psme_t010318	(at2g02170 : 299.0) Remorin family protein; FUNCTIONS IN: DNA binding; INVOLVED IN: biological_process unknown; LOCATED IN: plasma membrane; EXPRESSED IN: 22 plant structures; EXPRESSED DURING: 13 growth stages; CONTAINS InterPro DOMAIN/s: Remorin, C-terminal (InterPro:IPR005516); BEST Arabidopsis thaliana protein match is: Remorin family protein (TAIR:AT1G30320.1); Has 3690 Blast hits to 2594 pr…
27.3.99	RNA.regulation of transcription.unclassified	psme_t011716	(at1g69550 : 88.6) disease resistance protein (TIR-NBS-LRR class); FUNCTIONS IN: transmembrane receptor activity, nucleoside-triphosphatase activity, nucleotide binding, ATP binding; INVOLVED IN: signal transduction, defense response, apoptosis, innate immune response; LOCATED IN: intrinsic to membrane, endomembrane system; EXPRESSED IN: 21 plant structures; EXPRESSED DURING: 13 growth stages; CO…
27.3.99	RNA.regulation of transcription.unclassified	psme_t014832	(at5g13240 : 111.0) transcription regulators; FUNCTIONS IN: transcription regulator activity; INVOLVED IN: negative regulation of transcription from RNA polymerase III promoter; LOCATED IN: nucleus; EXPRESSED IN: 25 plant structures; EXPRESSED DURING: 14 growth stages; CONTAINS InterPro DOMAIN/s: Maf1 regulator (InterPro:IPR015257), RNA polymerase III transcriptional repressor, MAF1 (InterPro:IPR…
27.3.99	RNA.regulation of transcription.unclassified	psme_t015635	(at5g13240 : 111.0) transcription regulators; FUNCTIONS IN: transcription regulator activity; INVOLVED IN: negative regulation of transcription from RNA polymerase III promoter; LOCATED IN: nucleus; EXPRESSED IN: 25 plant structures; EXPRESSED DURING: 14 growth stages; CONTAINS InterPro DOMAIN/s: Maf1 regulator (InterPro:IPR015257), RNA polymerase III transcriptional repressor, MAF1 (InterPro:IPR…
27.3.99	RNA.regulation of transcription.unclassified	psme_t016490	(at1g75340 : 209.0) Zinc finger C-x8-C-x5-C-x3-H type family protein; FUNCTIONS IN: zinc ion binding, nucleic acid binding; INVOLVED IN: biological_process unknown; LOCATED IN: mitochondrion; EXPRESSED IN: 22 plant structures; EXPRESSED DURING: 13 growth stages; CONTAINS InterPro DOMAIN/s: Zinc finger, CCCH-type (InterPro:IPR000571). & (loc_os06g49080.1 : 166.0) no description available & (reliab…
27.3.99	RNA.regulation of transcription.unclassified	psme_t019288	(at1g67340 : 368.0) HCP-like superfamily protein with MYND-type zinc finger; FUNCTIONS IN: binding, zinc ion binding; INVOLVED IN: biological_process unknown; LOCATED IN: nucleus; EXPRESSED IN: 23 plant structures; EXPRESSED DURING: 13 growth stages; CONTAINS InterPro DOMAIN/s: Zinc finger, MYND-type (InterPro:IPR002893), Tetratricopeptide-like helical (InterPro:IPR011990), Sel1-like (InterPro:IP…
27.3.99	RNA.regulation of transcription.unclassified	psme_t020803	(at5g02190 : 347.0) encodes an aspartic protease, has an important role in determining cell fate during embryonic development and in reproduction processes. The loss-of-function mutation of PCS1 causes degeneration of both male and female gametophytes and excessive cell death of developing embryos during torpedo stage.; PROMOTION OF CELL SURVIVAL 1 (PCS1); CONTAINS InterPro DOMAIN/s: Peptidase as…
27.3.99	RNA.regulation of transcription.unclassified	psme_t020862	(at5g10770 : 327.0) Eukaryotic aspartyl protease family protein; FUNCTIONS IN: DNA binding, aspartic-type endopeptidase activity; INVOLVED IN: proteolysis; EXPRESSED IN: 12 plant structures; EXPRESSED DURING: 4 anthesis, C globular stage, petal differentiation and expansion stage, E expanded cotyledon stage; CONTAINS InterPro DOMAIN/s: Peptidase aspartic (InterPro:IPR021109), Peptidase aspartic, …
27.3.99	RNA.regulation of transcription.unclassified	psme_t021318	(at5g64950 : 112.0) Mitochondrial transcription termination factor family protein; FUNCTIONS IN: molecular_function unknown; INVOLVED IN: biological_process unknown; LOCATED IN: mitochondrion; EXPRESSED IN: 23 plant structures; EXPRESSED DURING: 13 growth stages; CONTAINS InterPro DOMAIN/s: Mitochodrial transcription termination factor-related (InterPro:IPR003690); BEST Arabidopsis thaliana prote…
27.3.99	RNA.regulation of transcription.unclassified	psme_t022919	(at5g13240 : 111.0) transcription regulators; FUNCTIONS IN: transcription regulator activity; INVOLVED IN: negative regulation of transcription from RNA polymerase III promoter; LOCATED IN: nucleus; EXPRESSED IN: 25 plant structures; EXPRESSED DURING: 14 growth stages; CONTAINS InterPro DOMAIN/s: Maf1 regulator (InterPro:IPR015257), RNA polymerase III transcriptional repressor, MAF1 (InterPro:IPR…
27.3.99	RNA.regulation of transcription.unclassified	psme_t023281	(at4g15080 : 95.5) DHHC-type zinc finger family protein; FUNCTIONS IN: zinc ion binding; INVOLVED IN: biological_process unknown; LOCATED IN: plasma membrane; CONTAINS InterPro DOMAIN/s: Zinc finger, DHHC-type (InterPro:IPR001594); BEST Arabidopsis thaliana protein match is: DHHC-type zinc finger family protein (TAIR:AT3G22180.1); Has 30201 Blast hits to 17322 proteins in 780 species: Archae - 12…
27.3.99	RNA.regulation of transcription.unclassified	psme_t023785	(at5g02190 : 306.0) encodes an aspartic protease, has an important role in determining cell fate during embryonic development and in reproduction processes. The loss-of-function mutation of PCS1 causes degeneration of both male and female gametophytes and excessive cell death of developing embryos during torpedo stage.; PROMOTION OF CELL SURVIVAL 1 (PCS1); CONTAINS InterPro DOMAIN/s: Peptidase as…
27.3.99	RNA.regulation of transcription.unclassified	psme_t025471	(at5g10770 : 338.0) Eukaryotic aspartyl protease family protein; FUNCTIONS IN: DNA binding, aspartic-type endopeptidase activity; INVOLVED IN: proteolysis; EXPRESSED IN: 12 plant structures; EXPRESSED DURING: 4 anthesis, C globular stage, petal differentiation and expansion stage, E expanded cotyledon stage; CONTAINS InterPro DOMAIN/s: Peptidase aspartic (InterPro:IPR021109), Peptidase aspartic, …
27.3.99	RNA.regulation of transcription.unclassified	psme_t027227	(loc_os06g41010.4 : 168.0) no description available & (at3g52800 : 164.0) A20/AN1-like zinc finger family protein; FUNCTIONS IN: DNA binding, zinc ion binding; INVOLVED IN: response to chitin; LOCATED IN: cellular_component unknown; EXPRESSED IN: 23 plant structures; EXPRESSED DURING: 15 growth stages; CONTAINS InterPro DOMAIN/s: Zinc finger, AN1-type (InterPro:IPR000058), Zinc finger, A20-type (…
27.3.99	RNA.regulation of transcription.unclassified	psme_t027429	(at5g02190 : 203.0) encodes an aspartic protease, has an important role in determining cell fate during embryonic development and in reproduction processes. The loss-of-function mutation of PCS1 causes degeneration of both male and female gametophytes and excessive cell death of developing embryos during torpedo stage.; PROMOTION OF CELL SURVIVAL 1 (PCS1); CONTAINS InterPro DOMAIN/s: Peptidase as…
27.3.99	RNA.regulation of transcription.unclassified	psme_t030525	(loc_os05g01940.1 : 122.0) no description available & (at2g40830 : 119.0) Encodes a putative RING-H2 finger protein RHC1a.; RING-H2 finger C1A (RHC1A); FUNCTIONS IN: zinc ion binding; LOCATED IN: cell wall; EXPRESSED IN: 22 plant structures; EXPRESSED DURING: 13 growth stages; CONTAINS InterPro DOMAIN/s: Zinc finger, RING-type (InterPro:IPR001841), Zinc finger, C3HC4 RING-type (InterPro:IPR018957…
27.3.99	RNA.regulation of transcription.unclassified	psme_t031812	(at5g13240 : 135.0) transcription regulators; FUNCTIONS IN: transcription regulator activity; INVOLVED IN: negative regulation of transcription from RNA polymerase III promoter; LOCATED IN: nucleus; EXPRESSED IN: 25 plant structures; EXPRESSED DURING: 14 growth stages; CONTAINS InterPro DOMAIN/s: Maf1 regulator (InterPro:IPR015257), RNA polymerase III transcriptional repressor, MAF1 (InterPro:IPR…
27.3.99	RNA.regulation of transcription.unclassified	psme_t032391	(at3g28917 : 104.0) mini zinc finger 2 (MIF2); CONTAINS InterPro DOMAIN/s: ZF-HD homeobox protein, Cys/His-rich dimerisation domain (InterPro:IPR006456); BEST Arabidopsis thaliana protein match is: mini zinc finger (TAIR:AT1G18835.1); Has 35333 Blast hits to 34131 proteins in 2444 species: Archae - 798; Bacteria - 22429; Metazoa - 974; Fungi - 991; Plants - 531; Viruses - 0; Other Eukaryotes - 96…
27.3.99	RNA.regulation of transcription.unclassified	psme_t032544	(at5g13240 : 199.0) transcription regulators; FUNCTIONS IN: transcription regulator activity; INVOLVED IN: negative regulation of transcription from RNA polymerase III promoter; LOCATED IN: nucleus; EXPRESSED IN: 25 plant structures; EXPRESSED DURING: 14 growth stages; CONTAINS InterPro DOMAIN/s: Maf1 regulator (InterPro:IPR015257), RNA polymerase III transcriptional repressor, MAF1 (InterPro:IPR…
27.3.99	RNA.regulation of transcription.unclassified	psme_t033151	(loc_os03g22830.2 : 156.0) no description available & (at2g40830 : 137.0) Encodes a putative RING-H2 finger protein RHC1a.; RING-H2 finger C1A (RHC1A); FUNCTIONS IN: zinc ion binding; LOCATED IN: cell wall; EXPRESSED IN: 22 plant structures; EXPRESSED DURING: 13 growth stages; CONTAINS InterPro DOMAIN/s: Zinc finger, RING-type (InterPro:IPR001841), Zinc finger, C3HC4 RING-type (InterPro:IPR018957…
27.3.99	RNA.regulation of transcription.unclassified	psme_t037765	(at5g13240 : 148.0) transcription regulators; FUNCTIONS IN: transcription regulator activity; INVOLVED IN: negative regulation of transcription from RNA polymerase III promoter; LOCATED IN: nucleus; EXPRESSED IN: 25 plant structures; EXPRESSED DURING: 14 growth stages; CONTAINS InterPro DOMAIN/s: Maf1 regulator (InterPro:IPR015257), RNA polymerase III transcriptional repressor, MAF1 (InterPro:IPR…
27.3.99	RNA.regulation of transcription.unclassified	psme_t041874	(chl4|525309 : 97.1) no description available & (at5g13240 : 94.4) transcription regulators; FUNCTIONS IN: transcription regulator activity; INVOLVED IN: negative regulation of transcription from RNA polymerase III promoter; LOCATED IN: nucleus; EXPRESSED IN: 25 plant structures; EXPRESSED DURING: 14 growth stages; CONTAINS InterPro DOMAIN/s: Maf1 regulator (InterPro:IPR015257), RNA polymerase II…
27.3.99	RNA.regulation of transcription.unclassified	psme_t043193	(at5g13240 : 155.0) transcription regulators; FUNCTIONS IN: transcription regulator activity; INVOLVED IN: negative regulation of transcription from RNA polymerase III promoter; LOCATED IN: nucleus; EXPRESSED IN: 25 plant structures; EXPRESSED DURING: 14 growth stages; CONTAINS InterPro DOMAIN/s: Maf1 regulator (InterPro:IPR015257), RNA polymerase III transcriptional repressor, MAF1 (InterPro:IPR…
27.3.99	RNA.regulation of transcription.unclassified	psme_t045819	(at3g28917 : 101.0) mini zinc finger 2 (MIF2); CONTAINS InterPro DOMAIN/s: ZF-HD homeobox protein, Cys/His-rich dimerisation domain (InterPro:IPR006456); BEST Arabidopsis thaliana protein match is: mini zinc finger (TAIR:AT1G18835.1); Has 35333 Blast hits to 34131 proteins in 2444 species: Archae - 798; Bacteria - 22429; Metazoa - 974; Fungi - 991; Plants - 531; Viruses - 0; Other Eukaryotes - 96…
27.3.99	RNA.regulation of transcription.unclassified	psme_t064242	(at4g19650 : 84.7) Mitochondrial transcription termination factor family protein; CONTAINS InterPro DOMAIN/s: Mitochodrial transcription termination factor-related (InterPro:IPR003690); BEST Arabidopsis thaliana protein match is: mitochondrial transcription termination factor-related / mTERF-related (TAIR:AT5G45113.1); Has 236 Blast hits to 231 proteins in 19 species: Archae - 0; Bacteria - 2; Me…
27.3.99	RNA.regulation of transcription.unclassified	psme_t073105	(loc_os03g22830.2 : 105.0) no description available & (at3g56580 : 97.1) RING/U-box superfamily protein; FUNCTIONS IN: zinc ion binding; INVOLVED IN: biological_process unknown; LOCATED IN: cellular_component unknown; EXPRESSED IN: 18 plant structures; EXPRESSED DURING: 11 growth stages; CONTAINS InterPro DOMAIN/s: Zinc finger, RING-type (InterPro:IPR001841), Zinc finger, C3HC4 RING-type (InterPr…
27.3.99	RNA.regulation of transcription.unclassified	psme_t078830	(at4g21160 : 89.0) ADP-ribosylation factor GTPase-activating protein containing zinc finger and C2 domains and a novel PI-3-P-binding protein region. Binds PI-3-P. Highest expression levels in flowering tissue, rosettes and roots. A member of ARF GAP domain (AGD), A thaliana has 15 members, grouped into four classes.; ZAC; FUNCTIONS IN: phospholipid binding, ARF GTPase activator activity; INVOLVE…
27.3.99	RNA.regulation of transcription.unclassified	psme_t096871	(at4g15080 : 215.0) DHHC-type zinc finger family protein; FUNCTIONS IN: zinc ion binding; INVOLVED IN: biological_process unknown; LOCATED IN: plasma membrane; CONTAINS InterPro DOMAIN/s: Zinc finger, DHHC-type (InterPro:IPR001594); BEST Arabidopsis thaliana protein match is: DHHC-type zinc finger family protein (TAIR:AT3G22180.1); Has 30201 Blast hits to 17322 proteins in 780 species: Archae - 1…

## Sheet: Bin 29.5 Protein Deg
Bin Code	Bin Name	Sequence Name	Description from Mercator Mapping
29.5	protein.degradation	psme_t010181	(at5g19740 : 638.0) Peptidase M28 family protein; FUNCTIONS IN: dipeptidase activity; INVOLVED IN: proteolysis; LOCATED IN: vacuole; CONTAINS InterPro DOMAIN/s: Protease-associated PA (InterPro:IPR003137), Transferrin receptor-like, dimerisation (InterPro:IPR007365), Peptidase M28 (InterPro:IPR007484); BEST Arabidopsis thaliana protein match is: Peptidase M28 family protein (TAIR:AT3G54720.1); Ha…
29.5	protein.degradation	psme_t010303	(at5g19740 : 657.0) Peptidase M28 family protein; FUNCTIONS IN: dipeptidase activity; INVOLVED IN: proteolysis; LOCATED IN: vacuole; CONTAINS InterPro DOMAIN/s: Protease-associated PA (InterPro:IPR003137), Transferrin receptor-like, dimerisation (InterPro:IPR007365), Peptidase M28 (InterPro:IPR007484); BEST Arabidopsis thaliana protein match is: Peptidase M28 family protein (TAIR:AT3G54720.1); Ha…
29.5	protein.degradation	psme_t011841	(at2g31870 : 457.0) mutant has Long free-running circadian period; Poly (ADP-ribose) Glycohydrolase; Sanskrit for 'bright' (TEJ); CONTAINS InterPro DOMAIN/s: Poly(ADP-ribose) glycohydrolase (InterPro:IPR007724); BEST Arabidopsis thaliana protein match is: poly(ADP-ribose) glycohydrolase 2 (TAIR:AT2G31865.2); Has 549 Blast hits to 374 proteins in 97 species: Archae - 0; Bacteria - 0; Metazoa - 324…
29.5	protein.degradation	psme_t018821	(at2g24280 : 538.0) alpha/beta-Hydrolases superfamily protein; FUNCTIONS IN: serine-type peptidase activity, serine-type carboxypeptidase activity; INVOLVED IN: proteolysis; LOCATED IN: endomembrane system, lysosome; EXPRESSED IN: 22 plant structures; EXPRESSED DURING: 13 growth stages; CONTAINS InterPro DOMAIN/s: Peptidase S28 (InterPro:IPR008758); BEST Arabidopsis thaliana protein match is: Ser…
29.5	protein.degradation	psme_t027228	(at3g08980 : 197.0) Peptidase S24/S26A/S26B/S26C family protein; FUNCTIONS IN: serine-type peptidase activity, peptidase activity; INVOLVED IN: proteolysis; LOCATED IN: membrane; EXPRESSED IN: 20 plant structures; EXPRESSED DURING: 10 growth stages; CONTAINS InterPro DOMAIN/s: Peptidase S24/S26A/S26B/S26C, beta-ribbon domain (InterPro:IPR011056), Peptidase S24/S26A/S26B, conserved region (InterPr…
29.5	protein.degradation	psme_t035477	(at5g04200 : 292.0) metacaspase 9 (MC9); FUNCTIONS IN: cysteine-type peptidase activity; INVOLVED IN: proteolysis; LOCATED IN: apoplast; EXPRESSED IN: 11 plant structures; EXPRESSED DURING: 4 anthesis, C globular stage, petal differentiation and expansion stage; CONTAINS InterPro DOMAIN/s: Peptidase C14, caspase catalytic (InterPro:IPR011600); BEST Arabidopsis thaliana protein match is: metacaspa…
29.5	protein.degradation	psme_t036350	(at5g27430 : 132.0) Signal peptidase subunit; FUNCTIONS IN: peptidase activity; INVOLVED IN: signal peptide processing; LOCATED IN: cell wall; EXPRESSED IN: 24 plant structures; EXPRESSED DURING: 15 growth stages; CONTAINS InterPro DOMAIN/s: Signal peptidase 22kDa subunit (InterPro:IPR007653); BEST Arabidopsis thaliana protein match is: Signal peptidase subunit (TAIR:AT3G05230.1); Has 1807 Blast …
29.5	protein.degradation	psme_t045835	(at5g22860 : 311.0) Serine carboxypeptidase S28 family protein; FUNCTIONS IN: serine-type peptidase activity, peptidase activity; INVOLVED IN: proteolysis; LOCATED IN: endomembrane system; EXPRESSED IN: 22 plant structures; EXPRESSED DURING: 13 growth stages; CONTAINS InterPro DOMAIN/s: Peptidase S28 (InterPro:IPR008758); BEST Arabidopsis thaliana protein match is: alpha/beta-Hydrolases superfami…
29.5	protein.degradation	psme_t066148	(loc_os01g01830.1 : 173.0) no description available & (at1g76140 : 172.0) Prolyl oligopeptidase family protein; FUNCTIONS IN: serine-type peptidase activity, serine-type endopeptidase activity; INVOLVED IN: proteolysis; LOCATED IN: chloroplast; EXPRESSED IN: 24 plant structures; EXPRESSED DURING: 15 growth stages; CONTAINS InterPro DOMAIN/s: Peptidase S9, prolyl oligopeptidase, catalytic domain (…
29.5	protein.degradation	psme_t090294	(loc_os01g01830.1 : 249.0) no description available & (at1g20380 : 248.0) Prolyl oligopeptidase family protein; FUNCTIONS IN: serine-type peptidase activity, serine-type endopeptidase activity; INVOLVED IN: proteolysis; LOCATED IN: cellular_component unknown; EXPRESSED IN: 19 plant structures; EXPRESSED DURING: 9 growth stages; CONTAINS InterPro DOMAIN/s: Peptidase S9, prolyl oligopeptidase, cata…
29.5	protein.degradation	psme_t160518	(at1g11080 : 198.0) serine carboxypeptidase-like 31 (scpl31); FUNCTIONS IN: serine-type carboxypeptidase activity; INVOLVED IN: proteolysis; LOCATED IN: endomembrane system; EXPRESSED IN: 17 plant structures; EXPRESSED DURING: 4 anthesis, C globular stage, petal differentiation and expansion stage, E expanded cotyledon stage, D bilateral stage; CONTAINS InterPro DOMAIN/s: Peptidase S10, serine ca…
29.5.1	protein.degradation.subtilases	psme_t005280	(loc_os03g55350.1 : 766.0) no description available & (at5g67360 : 762.0) Encodes a subtilisin-like serine protease essential for mucilage release from seed coats.; ARA12; FUNCTIONS IN: serine-type endopeptidase activity; INVOLVED IN: proteolysis, seed coat development, mucilage metabolic process involved seed coat development, mucilage extrusion from seed coat; LOCATED IN: extracellular region, …
29.5.1	protein.degradation.subtilases	psme_t006303	(loc_os01g52750.1 : 764.0) no description available & (at5g45650 : 701.0) subtilase family protein; FUNCTIONS IN: identical protein binding, serine-type endopeptidase activity; INVOLVED IN: proteolysis, negative regulation of catalytic activity; LOCATED IN: endomembrane system; EXPRESSED IN: 23 plant structures; EXPRESSED DURING: 13 growth stages; CONTAINS InterPro DOMAIN/s: Protease-associated P…
29.5.1	protein.degradation.subtilases	psme_t175657	(loc_os03g13930.1 : 94.7) no description available & (at2g05920 : 90.5) Subtilase family protein; FUNCTIONS IN: identical protein binding, serine-type endopeptidase activity; INVOLVED IN: proteolysis, negative regulation of catalytic activity; LOCATED IN: cell wall, plant-type cell wall; EXPRESSED IN: 22 plant structures; EXPRESSED DURING: 13 growth stages; CONTAINS InterPro DOMAIN/s: Protease-as…
29.5.11	protein.degradation.ubiquitin	psme_t027627	(loc_os11g36470.1 : 217.0) no description available & (at5g06600 : 215.0) Encodes a ubiquitin-specific protease.; ubiquitin-specific protease 12 (UBP12); FUNCTIONS IN: ubiquitin-specific protease activity, ubiquitin thiolesterase activity; INVOLVED IN: ubiquitin-dependent protein catabolic process; LOCATED IN: cellular_component unknown; EXPRESSED IN: 25 plant structures; EXPRESSED DURING: 14 gro…
29.5.11	protein.degradation.ubiquitin	psme_t028603	(loc_os11g36470.1 : 218.0) no description available & (at5g06600 : 217.0) Encodes a ubiquitin-specific protease.; ubiquitin-specific protease 12 (UBP12); FUNCTIONS IN: ubiquitin-specific protease activity, ubiquitin thiolesterase activity; INVOLVED IN: ubiquitin-dependent protein catabolic process; LOCATED IN: cellular_component unknown; EXPRESSED IN: 25 plant structures; EXPRESSED DURING: 14 gro…
29.5.11	protein.degradation.ubiquitin	psme_t028763	(q75gt2|mub1_orysa : 156.0) Membrane-anchored ubiquitin-fold protein 1 precursor (Membrane-anchored ub-fold protein 1) (OsMUB1) - Oryza sativa (Rice) & (loc_os03g31290.2 : 156.0) no description available & (at1g22050 : 155.0) membrane-anchored ubiquitin-fold protein 6 precursor (MUB6); CONTAINS InterPro DOMAIN/s: Membrane-anchored ubiquitin-fold protein, HCG-1 (InterPro:IPR017000), Ubiquitin supe…
29.5.11.2	protein.degradation.ubiquitin.E1	psme_t090078	(at5g06460 : 113.0) Encodes a ubiquitin-activating enzyme (E1), involved in the first step in conjugating multiple ubiquitins to proteins targeted for degradation. Gene is expressed in most tissues examined.; ubiquitin activating enzyme 2 (UBA 2); FUNCTIONS IN: ubiquitin-protein ligase activity, ubiquitin activating enzyme activity; INVOLVED IN: protein ubiquitination, ubiquitin-dependent protein…
29.5.11.3	protein.degradation.ubiquitin.E2	psme_t019045	(loc_os10g31000.1 : 137.0) no description available & (p16577|ubc4_wheat : 134.0) Ubiquitin-conjugating enzyme E2-23 kDa (EC 6.3.2.19) (Ubiquitin-protein ligase) (Ubiquitin carrier protein) - Triticum aestivum (Wheat) & (at5g41340 : 129.0) Belongs to Ubiquitin conjugating enzyme family. Gene expression is developmentally regulated.; ubiquitin conjugating enzyme 4 (UBC4); CONTAINS InterPro DOMAIN/…
29.5.11.3	protein.degradation.ubiquitin.E2	psme_t021727	(loc_os10g31000.2 : 87.0) no description available & (p16577|ubc4_wheat : 83.6) Ubiquitin-conjugating enzyme E2-23 kDa (EC 6.3.2.19) (Ubiquitin-protein ligase) (Ubiquitin carrier protein) - Triticum aestivum (Wheat) & (at5g41340 : 80.9) Belongs to Ubiquitin conjugating enzyme family. Gene expression is developmentally regulated.; ubiquitin conjugating enzyme 4 (UBC4); CONTAINS InterPro DOMAIN/s: …
29.5.11.4.1	protein.degradation.ubiquitin.E3.HECT	psme_t009141	(chl4|518963 : 280.0) no description available & (loc_os09g07900.1 : 211.0) no description available & (ipr000569 : 206.64487) HECT & (at1g55860 : 205.0) encodes a ubiquitin-protein ligase containing a HECT domain. There are six other HECT-domain UPLs in Arabidopsis.; ubiquitin-protein ligase 1 (UPL1); CONTAINS InterPro DOMAIN/s: Ubiquitin-associated/translation elongation factor EF1B, N-terminal…
29.5.11.4.1	protein.degradation.ubiquitin.E3.HECT	psme_t009695	(chl4|518963 : 279.0) no description available & (loc_os09g07900.1 : 210.0) no description available & (ipr000569 : 206.00888) HECT & (at1g55860 : 204.0) encodes a ubiquitin-protein ligase containing a HECT domain. There are six other HECT-domain UPLs in Arabidopsis.; ubiquitin-protein ligase 1 (UPL1); CONTAINS InterPro DOMAIN/s: Ubiquitin-associated/translation elongation factor EF1B, N-terminal…
29.5.11.4.2	protein.degradation.ubiquitin.E3.RING	psme_t000144	(loc_os04g55510.1 : 151.0) no description available & (at4g34040 : 146.0) RING/U-box superfamily protein; FUNCTIONS IN: zinc ion binding; EXPRESSED IN: 24 plant structures; EXPRESSED DURING: 14 growth stages; CONTAINS InterPro DOMAIN/s: Zinc finger, RING-type (InterPro:IPR001841), Zinc finger, C3HC4 RING-type (InterPro:IPR018957); BEST Arabidopsis thaliana protein match is: RING/U-box superfamily…
29.5.11.4.2	protein.degradation.ubiquitin.E3.RING	psme_t002991	(loc_os04g55510.1 : 152.0) no description available & (at1g45180 : 149.0) RING/U-box superfamily protein; FUNCTIONS IN: zinc ion binding; EXPRESSED IN: 18 plant structures; EXPRESSED DURING: 11 growth stages; CONTAINS InterPro DOMAIN/s: Zinc finger, RING-type (InterPro:IPR001841), Zinc finger, C3HC4 RING-type (InterPro:IPR018957); BEST Arabidopsis thaliana protein match is: RING/U-box superfamily…
29.5.11.4.2	protein.degradation.ubiquitin.E3.RING	psme_t003787	(loc_os03g22830.2 : 189.0) no description available & (at2g40830 : 186.0) Encodes a putative RING-H2 finger protein RHC1a.; RING-H2 finger C1A (RHC1A); FUNCTIONS IN: zinc ion binding; LOCATED IN: cell wall; EXPRESSED IN: 22 plant structures; EXPRESSED DURING: 13 growth stages; CONTAINS InterPro DOMAIN/s: Zinc finger, RING-type (InterPro:IPR001841), Zinc finger, C3HC4 RING-type (InterPro:IPR018957…
29.5.11.4.2	protein.degradation.ubiquitin.E3.RING	psme_t005414	(at1g71980 : 198.0) Protease-associated (PA) RING/U-box zinc finger family protein; FUNCTIONS IN: peptidase activity, zinc ion binding; LOCATED IN: endomembrane system; EXPRESSED IN: 23 plant structures; EXPRESSED DURING: 15 growth stages; CONTAINS InterPro DOMAIN/s: Protease-associated PA (InterPro:IPR003137), Zinc finger, RING-type (InterPro:IPR001841), Zinc finger, C3HC4 RING-type (InterPro:IP…
29.5.11.4.2	protein.degradation.ubiquitin.E3.RING	psme_t006002	(loc_os03g07130.5 : 137.0) no description available & (at1g71980 : 130.0) Protease-associated (PA) RING/U-box zinc finger family protein; FUNCTIONS IN: peptidase activity, zinc ion binding; LOCATED IN: endomembrane system; EXPRESSED IN: 23 plant structures; EXPRESSED DURING: 15 growth stages; CONTAINS InterPro DOMAIN/s: Protease-associated PA (InterPro:IPR003137), Zinc finger, RING-type (InterPro…
29.5.11.4.2	protein.degradation.ubiquitin.E3.RING	psme_t006760	(loc_os03g07130.4 : 214.0) no description available & (at1g71980 : 211.0) Protease-associated (PA) RING/U-box zinc finger family protein; FUNCTIONS IN: peptidase activity, zinc ion binding; LOCATED IN: endomembrane system; EXPRESSED IN: 23 plant structures; EXPRESSED DURING: 15 growth stages; CONTAINS InterPro DOMAIN/s: Protease-associated PA (InterPro:IPR003137), Zinc finger, RING-type (InterPro…
29.5.11.4.2	protein.degradation.ubiquitin.E3.RING	psme_t006995	(loc_os04g55510.1 : 152.0) no description available & (at4g34040 : 147.0) RING/U-box superfamily protein; FUNCTIONS IN: zinc ion binding; EXPRESSED IN: 24 plant structures; EXPRESSED DURING: 14 growth stages; CONTAINS InterPro DOMAIN/s: Zinc finger, RING-type (InterPro:IPR001841), Zinc finger, C3HC4 RING-type (InterPro:IPR018957); BEST Arabidopsis thaliana protein match is: RING/U-box superfamily…
29.5.11.4.2	protein.degradation.ubiquitin.E3.RING	psme_t008151	(loc_os01g52110.8 : 365.0) no description available & (at5g25560 : 349.0) CHY-type/CTCHY-type/RING-type Zinc finger protein; FUNCTIONS IN: zinc ion binding; EXPRESSED IN: 24 plant structures; EXPRESSED DURING: 15 growth stages; CONTAINS InterPro DOMAIN/s: Zinc finger, CTCHY-type (InterPro:IPR017921), Zinc finger, CHY-type (InterPro:IPR008913), Zinc finger, RING-type (InterPro:IPR001841), Zinc fin…
29.5.11.4.2	protein.degradation.ubiquitin.E3.RING	psme_t009640	(at4g34040 : 143.0) RING/U-box superfamily protein; FUNCTIONS IN: zinc ion binding; EXPRESSED IN: 24 plant structures; EXPRESSED DURING: 14 growth stages; CONTAINS InterPro DOMAIN/s: Zinc finger, RING-type (InterPro:IPR001841), Zinc finger, C3HC4 RING-type (InterPro:IPR018957); BEST Arabidopsis thaliana protein match is: RING/U-box superfamily protein (TAIR:AT2G15530.3); Has 8873 Blast hits to 78…
29.5.11.4.2	protein.degradation.ubiquitin.E3.RING	psme_t009961	(at3g49810 : 445.0) ARM repeat superfamily protein; FUNCTIONS IN: ubiquitin-protein ligase activity, binding; INVOLVED IN: protein ubiquitination; LOCATED IN: ubiquitin ligase complex; EXPRESSED IN: 22 plant structures; EXPRESSED DURING: 13 growth stages; CONTAINS InterPro DOMAIN/s: U box domain (InterPro:IPR003613), Armadillo-like helical (InterPro:IPR011989), Armadillo-type fold (InterPro:IPR01…
29.5.11.4.2	protein.degradation.ubiquitin.E3.RING	psme_t011280	(at4g32600 : 284.0) zinc finger (C3HC4-type RING finger) family protein; FUNCTIONS IN: protein binding, zinc ion binding; LOCATED IN: plasma membrane; EXPRESSED IN: 24 plant structures; EXPRESSED DURING: 15 growth stages; CONTAINS InterPro DOMAIN/s: Zinc finger, RING-type (InterPro:IPR001841), Zinc finger, RING/FYVE/PHD-type (InterPro:IPR013083); BEST Arabidopsis thaliana protein match is: zinc f…
29.5.11.4.2	protein.degradation.ubiquitin.E3.RING	psme_t016155	(at3g03550 : 115.0) RING/U-box superfamily protein; FUNCTIONS IN: zinc ion binding; INVOLVED IN: response to karrikin; EXPRESSED IN: 19 plant structures; EXPRESSED DURING: 8 growth stages; CONTAINS InterPro DOMAIN/s: Zinc finger, RING-type (InterPro:IPR001841), Zinc finger, C3HC4 RING-type (InterPro:IPR018957); BEST Arabidopsis thaliana protein match is: RING/U-box superfamily protein (TAIR:AT5G1…
29.5.11.4.2	protein.degradation.ubiquitin.E3.RING	psme_t017609	(at2g04240 : 117.0) Encodes a small protein with an N-terminal trans-membrane domain and a RING-H2 zinc finger motif located at the C-terminus. Gene expression is induced by salt and osmotic stress. Transcrips levels are induced by DELLA proteins and repressed by gibberellic acid. Involved in ABA metabolism.; XERICO; CONTAINS InterPro DOMAIN/s: Zinc finger, RING-type (InterPro:IPR001841), Zinc fi…
29.5.11.4.2	protein.degradation.ubiquitin.E3.RING	psme_t021053	(at3g16720 : 114.0) RING-H2 protein induced after exposure to chitin or inactivated crude cellulase preparations.; TOXICOS EN LEVADURA 2 (ATL2); FUNCTIONS IN: zinc ion binding; INVOLVED IN: response to chitin, defense response; EXPRESSED IN: 22 plant structures; EXPRESSED DURING: 13 growth stages; CONTAINS InterPro DOMAIN/s: Zinc finger, RING-type (InterPro:IPR001841), Zinc finger, C3HC4 RING-typ…
29.5.11.4.2	protein.degradation.ubiquitin.E3.RING	psme_t022479	(at1g72310 : 122.0) Encodes a putative RING-H2 zinc finger protein ATL3 (ATL3).; ATL3; FUNCTIONS IN: zinc ion binding; EXPRESSED IN: 22 plant structures; EXPRESSED DURING: 13 growth stages; CONTAINS InterPro DOMAIN/s: Zinc finger, RING-type (InterPro:IPR001841), Zinc finger, C3HC4 RING-type (InterPro:IPR018957); BEST Arabidopsis thaliana protein match is: RING/U-box superfamily protein (TAIR:AT1G…
29.5.11.4.2	protein.degradation.ubiquitin.E3.RING	psme_t022853	(loc_os03g11260.1 : 303.0) no description available & (at3g29270 : 283.0) RING/U-box superfamily protein; CONTAINS InterPro DOMAIN/s: Zinc finger, RING-type, conserved site (InterPro:IPR017907), Zinc finger, RING-type (InterPro:IPR001841); BEST Arabidopsis thaliana protein match is: RING/U-box superfamily protein (TAIR:AT1G69330.1); Has 35333 Blast hits to 34131 proteins in 2444 species: Archae -…
29.5.11.4.2	protein.degradation.ubiquitin.E3.RING	psme_t023993	(at3g16720 : 117.0) RING-H2 protein induced after exposure to chitin or inactivated crude cellulase preparations.; TOXICOS EN LEVADURA 2 (ATL2); FUNCTIONS IN: zinc ion binding; INVOLVED IN: response to chitin, defense response; EXPRESSED IN: 22 plant structures; EXPRESSED DURING: 13 growth stages; CONTAINS InterPro DOMAIN/s: Zinc finger, RING-type (InterPro:IPR001841), Zinc finger, C3HC4 RING-typ…
29.5.11.4.2	protein.degradation.ubiquitin.E3.RING	psme_t024976	(q64ha9|spl11_orysa : 151.0) Spotted leaf protein 11 (Spotted leaf11) (Cell death-related protein SPL11) - Oryza sativa (Rice) & (loc_os12g38210.2 : 151.0) no description available & (at5g67340 : 150.0) ARM repeat superfamily protein; FUNCTIONS IN: ubiquitin-protein ligase activity, binding; INVOLVED IN: protein ubiquitination; LOCATED IN: endomembrane system, ubiquitin ligase complex; EXPRESSED …
29.5.11.4.2	protein.degradation.ubiquitin.E3.RING	psme_t026857	(loc_os03g11260.1 : 303.0) no description available & (at3g29270 : 283.0) RING/U-box superfamily protein; CONTAINS InterPro DOMAIN/s: Zinc finger, RING-type, conserved site (InterPro:IPR017907), Zinc finger, RING-type (InterPro:IPR001841); BEST Arabidopsis thaliana protein match is: RING/U-box superfamily protein (TAIR:AT1G69330.1); Has 35333 Blast hits to 34131 proteins in 2444 species: Archae -…
29.5.11.4.2	protein.degradation.ubiquitin.E3.RING	psme_t026995	(at1g72310 : 122.0) Encodes a putative RING-H2 zinc finger protein ATL3 (ATL3).; ATL3; FUNCTIONS IN: zinc ion binding; EXPRESSED IN: 22 plant structures; EXPRESSED DURING: 13 growth stages; CONTAINS InterPro DOMAIN/s: Zinc finger, RING-type (InterPro:IPR001841), Zinc finger, C3HC4 RING-type (InterPro:IPR018957); BEST Arabidopsis thaliana protein match is: RING/U-box superfamily protein (TAIR:AT1G…
29.5.11.4.2	protein.degradation.ubiquitin.E3.RING	psme_t030525	(loc_os05g01940.1 : 122.0) no description available & (at2g40830 : 119.0) Encodes a putative RING-H2 finger protein RHC1a.; RING-H2 finger C1A (RHC1A); FUNCTIONS IN: zinc ion binding; LOCATED IN: cell wall; EXPRESSED IN: 22 plant structures; EXPRESSED DURING: 13 growth stages; CONTAINS InterPro DOMAIN/s: Zinc finger, RING-type (InterPro:IPR001841), Zinc finger, C3HC4 RING-type (InterPro:IPR018957…
29.5.11.4.2	protein.degradation.ubiquitin.E3.RING	psme_t032233	(at4g35480 : 90.5) Encodes a putative RING-H2 finger protein RHA3b.; RING-H2 finger A3B (RHA3B); FUNCTIONS IN: zinc ion binding; INVOLVED IN: response to chitin; EXPRESSED IN: 20 plant structures; EXPRESSED DURING: 13 growth stages; CONTAINS InterPro DOMAIN/s: Zinc finger, RING-type (InterPro:IPR001841), Zinc finger, C3HC4 RING-type (InterPro:IPR018957); BEST Arabidopsis thaliana protein match is…
29.5.11.4.2	protein.degradation.ubiquitin.E3.RING	psme_t032804	(q64ha9|spl11_orysa : 151.0) Spotted leaf protein 11 (Spotted leaf11) (Cell death-related protein SPL11) - Oryza sativa (Rice) & (loc_os12g38210.2 : 151.0) no description available & (at5g67340 : 150.0) ARM repeat superfamily protein; FUNCTIONS IN: ubiquitin-protein ligase activity, binding; INVOLVED IN: protein ubiquitination; LOCATED IN: endomembrane system, ubiquitin ligase complex; EXPRESSED …
29.5.11.4.2	protein.degradation.ubiquitin.E3.RING	psme_t032895	(at3g61460 : 107.0) Encodes a novel ring finger protein and forms an N-terminal hydrophobic domain and a C-terminal RING-H2 signature. Expression is down regulated by brassinolide.; brassinosteroid-responsive RING-H2 (BRH1); FUNCTIONS IN: zinc ion binding; INVOLVED IN: response to brassinosteroid stimulus, response to chitin; LOCATED IN: endomembrane system; EXPRESSED IN: 22 plant structures; EXP…
29.5.11.4.2	protein.degradation.ubiquitin.E3.RING	psme_t033151	(loc_os03g22830.2 : 156.0) no description available & (at2g40830 : 137.0) Encodes a putative RING-H2 finger protein RHC1a.; RING-H2 finger C1A (RHC1A); FUNCTIONS IN: zinc ion binding; LOCATED IN: cell wall; EXPRESSED IN: 22 plant structures; EXPRESSED DURING: 13 growth stages; CONTAINS InterPro DOMAIN/s: Zinc finger, RING-type (InterPro:IPR001841), Zinc finger, C3HC4 RING-type (InterPro:IPR018957…
29.5.11.4.2	protein.degradation.ubiquitin.E3.RING	psme_t041387	(at5g42200 : 90.1) RING/U-box superfamily protein; CONTAINS InterPro DOMAIN/s: Zinc finger, RING-type (InterPro:IPR001841), Zinc finger, C3HC4 RING-type (InterPro:IPR018957); BEST Arabidopsis thaliana protein match is: RING/U-box superfamily protein (TAIR:AT1G49220.1); Has 1807 Blast hits to 1807 proteins in 277 species: Archae - 0; Bacteria - 0; Metazoa - 736; Fungi - 347; Plants - 385; Viruses …
29.5.11.4.2	protein.degradation.ubiquitin.E3.RING	psme_t044174	(at1g49230 : 126.0) RING/U-box superfamily protein; FUNCTIONS IN: zinc ion binding; EXPRESSED IN: 17 plant structures; EXPRESSED DURING: 11 growth stages; CONTAINS InterPro DOMAIN/s: Zinc finger, RING-type (InterPro:IPR001841), Zinc finger, C3HC4 RING-type (InterPro:IPR018957); BEST Arabidopsis thaliana protein match is: RING/U-box superfamily protein (TAIR:AT1G49200.1); Has 9168 Blast hits to 91…
29.5.11.4.2	protein.degradation.ubiquitin.E3.RING	psme_t047417	(at1g49230 : 117.0) RING/U-box superfamily protein; FUNCTIONS IN: zinc ion binding; EXPRESSED IN: 17 plant structures; EXPRESSED DURING: 11 growth stages; CONTAINS InterPro DOMAIN/s: Zinc finger, RING-type (InterPro:IPR001841), Zinc finger, C3HC4 RING-type (InterPro:IPR018957); BEST Arabidopsis thaliana protein match is: RING/U-box superfamily protein (TAIR:AT1G49200.1); Has 9168 Blast hits to 91…
29.5.11.4.2	protein.degradation.ubiquitin.E3.RING	psme_t050049	(at4g30370 : 89.7) RING/U-box superfamily protein; FUNCTIONS IN: zinc ion binding; INVOLVED IN: response to chitin; CONTAINS InterPro DOMAIN/s: Zinc finger, RING-type (InterPro:IPR001841), Zinc finger, C3HC4 RING-type (InterPro:IPR018957); BEST Arabidopsis thaliana protein match is: RING/U-box superfamily protein (TAIR:AT2G18670.1); Has 7837 Blast hits to 7816 proteins in 262 species: Archae - 0;…
29.5.11.4.2	protein.degradation.ubiquitin.E3.RING	psme_t050352	(at4g01270 : 172.0) RING/U-box superfamily protein; FUNCTIONS IN: zinc ion binding; EXPRESSED IN: 12 plant structures; EXPRESSED DURING: 7 growth stages; CONTAINS InterPro DOMAIN/s: Zinc finger, RING-type (InterPro:IPR001841), Zinc finger, C3HC4 RING-type (InterPro:IPR018957); BEST Arabidopsis thaliana protein match is: unknown protein (TAIR:AT4G01245.1); Has 5689 Blast hits to 5015 proteins in 4…
29.5.11.4.2	protein.degradation.ubiquitin.E3.RING	psme_t051624	(at5g01880 : 99.8) RING/U-box superfamily protein; FUNCTIONS IN: zinc ion binding; EXPRESSED IN: 10 plant structures; EXPRESSED DURING: LP.04 four leaves visible, 4 anthesis, C globular stage, petal differentiation and expansion stage; CONTAINS InterPro DOMAIN/s: Zinc finger, RING-type (InterPro:IPR001841), Zinc finger, C3HC4 RING-type (InterPro:IPR018957); BEST Arabidopsis thaliana protein match…
29.5.11.4.2	protein.degradation.ubiquitin.E3.RING	psme_t055154	(loc_os02g33720.1 : 94.7) no description available & (at3g18773 : 93.6) RING/U-box superfamily protein; FUNCTIONS IN: zinc ion binding; CONTAINS InterPro DOMAIN/s: Zinc finger, RING-type (InterPro:IPR001841), Zinc finger, C3HC4 RING-type (InterPro:IPR018957); BEST Arabidopsis thaliana protein match is: RING/U-box superfamily protein (TAIR:AT1G49200.1); Has 8714 Blast hits to 8693 proteins in 277 …
29.5.11.4.2	protein.degradation.ubiquitin.E3.RING	psme_t065687	(at3g16720 : 118.0) RING-H2 protein induced after exposure to chitin or inactivated crude cellulase preparations.; TOXICOS EN LEVADURA 2 (ATL2); FUNCTIONS IN: zinc ion binding; INVOLVED IN: response to chitin, defense response; EXPRESSED IN: 22 plant structures; EXPRESSED DURING: 13 growth stages; CONTAINS InterPro DOMAIN/s: Zinc finger, RING-type (InterPro:IPR001841), Zinc finger, C3HC4 RING-typ…
29.5.11.4.2	protein.degradation.ubiquitin.E3.RING	psme_t065813	(at1g49230 : 103.0) RING/U-box superfamily protein; FUNCTIONS IN: zinc ion binding; EXPRESSED IN: 17 plant structures; EXPRESSED DURING: 11 growth stages; CONTAINS InterPro DOMAIN/s: Zinc finger, RING-type (InterPro:IPR001841), Zinc finger, C3HC4 RING-type (InterPro:IPR018957); BEST Arabidopsis thaliana protein match is: RING/U-box superfamily protein (TAIR:AT1G49200.1); Has 9168 Blast hits to 91…
29.5.11.4.2	protein.degradation.ubiquitin.E3.RING	psme_t065837	(at3g16720 : 114.0) RING-H2 protein induced after exposure to chitin or inactivated crude cellulase preparations.; TOXICOS EN LEVADURA 2 (ATL2); FUNCTIONS IN: zinc ion binding; INVOLVED IN: response to chitin, defense response; EXPRESSED IN: 22 plant structures; EXPRESSED DURING: 13 growth stages; CONTAINS InterPro DOMAIN/s: Zinc finger, RING-type (InterPro:IPR001841), Zinc finger, C3HC4 RING-typ…
29.5.11.4.2	protein.degradation.ubiquitin.E3.RING	psme_t066382	(at1g53820 : 80.9) RING/U-box superfamily protein; FUNCTIONS IN: zinc ion binding; CONTAINS InterPro DOMAIN/s: Zinc finger, RING-type (InterPro:IPR001841), Zinc finger, C3HC4 RING-type (InterPro:IPR018957); BEST Arabidopsis thaliana protein match is: RING/U-box superfamily protein (TAIR:AT1G72310.1); Has 9301 Blast hits to 9282 proteins in 297 species: Archae - 0; Bacteria - 0; Metazoa - 2391; Fu…
29.5.11.4.2	protein.degradation.ubiquitin.E3.RING	psme_t067388	(loc_os08g35060.1 : 131.0) no description available & (at4g19670 : 125.0) RING/U-box superfamily protein; FUNCTIONS IN: zinc ion binding; EXPRESSED IN: 22 plant structures; EXPRESSED DURING: 13 growth stages; CONTAINS InterPro DOMAIN/s: Zinc finger, RING-type, conserved site (InterPro:IPR017907), Zinc finger, C6HC-type (InterPro:IPR002867), Zinc finger, RING-type (InterPro:IPR001841); BEST Arabid…
29.5.11.4.2	protein.degradation.ubiquitin.E3.RING	psme_t073105	(loc_os03g22830.2 : 105.0) no description available & (at3g56580 : 97.1) RING/U-box superfamily protein; FUNCTIONS IN: zinc ion binding; INVOLVED IN: biological_process unknown; LOCATED IN: cellular_component unknown; EXPRESSED IN: 18 plant structures; EXPRESSED DURING: 11 growth stages; CONTAINS InterPro DOMAIN/s: Zinc finger, RING-type (InterPro:IPR001841), Zinc finger, C3HC4 RING-type (InterPr…
29.5.11.4.2	protein.degradation.ubiquitin.E3.RING	psme_t092381	(loc_os07g47590.3 : 142.0) no description available & (at2g38920 : 140.0) SPX (SYG1/Pho81/XPR1) domain-containing protein / zinc finger (C3HC4-type RING finger) protein-related; FUNCTIONS IN: zinc ion binding; EXPRESSED IN: male gametophyte, flower, pollen tube; EXPRESSED DURING: M germinated pollen stage, 4 anthesis; CONTAINS InterPro DOMAIN/s: Zinc finger, RING-type, conserved site (InterPro:IP…
29.5.11.4.3.2	protein.degradation.ubiquitin.E3.SCF.FBOX	psme_t004561	(at2g36370 : 259.0) ubiquitin-protein ligases; CONTAINS InterPro DOMAIN/s: BTB/POZ (InterPro:IPR013069), BTB/POZ fold (InterPro:IPR011333), BTB/Kelch-associated (InterPro:IPR011705), Leucine-rich repeat, cysteine-containing subtype (InterPro:IPR006553), BTB/POZ-like (InterPro:IPR000210); BEST Arabidopsis thaliana protein match is: F-box/RNI-like superfamily protein (TAIR:AT3G62980.1); Has 4192 Bl…
29.5.11.4.3.2	protein.degradation.ubiquitin.E3.SCF.FBOX	psme_t007101	(at1g22040 : 152.0) Galactose oxidase/kelch repeat superfamily protein; FUNCTIONS IN: molecular_function unknown; INVOLVED IN: N-terminal protein myristoylation; LOCATED IN: chloroplast; EXPRESSED IN: 23 plant structures; EXPRESSED DURING: 13 growth stages; CONTAINS InterPro DOMAIN/s: F-box domain, cyclin-like (InterPro:IPR001810), Galactose oxidase/kelch, beta-propeller (InterPro:IPR011043), Kel…
29.5.11.4.3.2	protein.degradation.ubiquitin.E3.SCF.FBOX	psme_t013437	(loc_os12g03740.1 : 164.0) no description available & (at2g02240 : 157.0) maternal effect embryo arrest 66 (MEE66); CONTAINS InterPro DOMAIN/s: F-box domain, cyclin-like (InterPro:IPR001810), F-box domain, Skp2-like (InterPro:IPR022364); BEST Arabidopsis thaliana protein match is: phloem protein 2-B2 (TAIR:AT2G02250.1); Has 35333 Blast hits to 34131 proteins in 2444 species: Archae - 798; Bacteri…
29.5.11.4.3.2	protein.degradation.ubiquitin.E3.SCF.FBOX	psme_t014662	(at2g36370 : 394.0) ubiquitin-protein ligases; CONTAINS InterPro DOMAIN/s: BTB/POZ (InterPro:IPR013069), BTB/POZ fold (InterPro:IPR011333), BTB/Kelch-associated (InterPro:IPR011705), Leucine-rich repeat, cysteine-containing subtype (InterPro:IPR006553), BTB/POZ-like (InterPro:IPR000210); BEST Arabidopsis thaliana protein match is: F-box/RNI-like superfamily protein (TAIR:AT3G62980.1); Has 4192 Bl…
29.5.11.4.3.2	protein.degradation.ubiquitin.E3.SCF.FBOX	psme_t015987	(loc_os12g31850.5 : 523.0) no description available & (at2g03530 : 501.0) Mediate high-affinity uracil and 5-FU (a toxic uracil analogue) transport when expressed in yeast and Xenopus oocytes.Involved in allantoin transport.; ureide permease 2 (UPS2); FUNCTIONS IN: uracil:cation symporter activity; LOCATED IN: plasma membrane; EXPRESSED IN: 25 plant structures; EXPRESSED DURING: 10 growth stages;…
29.5.11.4.3.2	protein.degradation.ubiquitin.E3.SCF.FBOX	psme_t016513	(at1g27340 : 83.2) Galactose oxidase/kelch repeat superfamily protein; CONTAINS InterPro DOMAIN/s: F-box domain, cyclin-like (InterPro:IPR001810), F-box domain, Skp2-like (InterPro:IPR022364), Galactose oxidase/kelch, beta-propeller (InterPro:IPR011043); BEST Arabidopsis thaliana protein match is: Galactose oxidase/kelch repeat superfamily protein (TAIR:AT5G15710.1); Has 1110 Blast hits to 1104 p…
29.5.11.4.3.2	protein.degradation.ubiquitin.E3.SCF.FBOX	psme_t018654	(loc_os01g69940.1 : 112.0) no description available & (at1g30950 : 109.0) Required for the proper identity of the floral meristem. Involved in establishing the whorled pattern of floral organs, in the control of specification of the floral meristem, and in the activation of APETALA3 and PISTILLATA. UFO is found at the AP3 promoter in a LFY-dependent manner, suggesting that it works with LFY to re…
29.5.11.4.3.2	protein.degradation.ubiquitin.E3.SCF.FBOX	psme_t019425	(at1g22040 : 152.0) Galactose oxidase/kelch repeat superfamily protein; FUNCTIONS IN: molecular_function unknown; INVOLVED IN: N-terminal protein myristoylation; LOCATED IN: chloroplast; EXPRESSED IN: 23 plant structures; EXPRESSED DURING: 13 growth stages; CONTAINS InterPro DOMAIN/s: F-box domain, cyclin-like (InterPro:IPR001810), Galactose oxidase/kelch, beta-propeller (InterPro:IPR011043), Kel…
29.5.11.4.3.2	protein.degradation.ubiquitin.E3.SCF.FBOX	psme_t056004	(at3g53000 : 87.0) phloem protein 2-A15 (PP2-A15); FUNCTIONS IN: carbohydrate binding; INVOLVED IN: N-terminal protein myristoylation; LOCATED IN: cellular_component unknown; EXPRESSED IN: 24 plant structures; EXPRESSED DURING: 14 growth stages; CONTAINS InterPro DOMAIN/s: F-box domain, cyclin-like (InterPro:IPR001810), F-box domain, Skp2-like (InterPro:IPR022364); BEST Arabidopsis thaliana prote…
29.5.11.4.3.2	protein.degradation.ubiquitin.E3.SCF.FBOX	psme_t070705	(at3g26810 : 107.0) auxin signaling F-box 2 (AFB2); FUNCTIONS IN: ubiquitin-protein ligase activity, auxin binding; INVOLVED IN: stamen development, pollen maturation, response to molecule of bacterial origin; LOCATED IN: plasma membrane; EXPRESSED IN: 26 plant structures; EXPRESSED DURING: 14 growth stages; CONTAINS InterPro DOMAIN/s: F-box domain, cyclin-like (InterPro:IPR001810); BEST Arabidop…
29.5.11.4.3.2	protein.degradation.ubiquitin.E3.SCF.FBOX	psme_t124472	(at4g24210 : 82.8) F-box protein that is involved in GA signaling. Regulates seed germination. Component of E3 ubiquitin complex. Interacts with DELLA proteins.; SLEEPY1 (SLY1); CONTAINS InterPro DOMAIN/s: F-box domain, cyclin-like (InterPro:IPR001810), F-box domain, Skp2-like (InterPro:IPR022364); BEST Arabidopsis thaliana protein match is: F-box family protein (TAIR:AT5G48170.1); Has 122 Blast …
29.5.11.4.3.2	protein.degradation.ubiquitin.E3.SCF.FBOX	psme_t174469	(at3g59940 : 105.0) Galactose oxidase/kelch repeat superfamily protein; CONTAINS InterPro DOMAIN/s: F-box domain, cyclin-like (InterPro:IPR001810), Galactose oxidase/kelch, beta-propeller (InterPro:IPR011043), Kelch repeat type 1 (InterPro:IPR006652), Kelch related (InterPro:IPR013089), Kelch-type beta propeller (InterPro:IPR015915); BEST Arabidopsis thaliana protein match is: Galactose oxidase/k…
29.5.11.5	protein.degradation.ubiquitin.ubiquitin protease	psme_t004534	(loc_os04g34984.2 : 113.0) no description available & (at4g39370 : 105.0) Encodes a ubiquitin-specific protease.; ubiquitin-specific protease 27 (UBP27); FUNCTIONS IN: ubiquitin-specific protease activity, ubiquitin thiolesterase activity; INVOLVED IN: ubiquitin-dependent protein catabolic process; EXPRESSED IN: 19 plant structures; EXPRESSED DURING: 12 growth stages; CONTAINS InterPro DOMAIN/s: …
29.5.11.5	protein.degradation.ubiquitin.ubiquitin protease	psme_t007112	(loc_os04g34984.1 : 213.0) no description available & (at4g39370 : 208.0) Encodes a ubiquitin-specific protease.; ubiquitin-specific protease 27 (UBP27); FUNCTIONS IN: ubiquitin-specific protease activity, ubiquitin thiolesterase activity; INVOLVED IN: ubiquitin-dependent protein catabolic process; EXPRESSED IN: 19 plant structures; EXPRESSED DURING: 12 growth stages; CONTAINS InterPro DOMAIN/s: …
29.5.11.5	protein.degradation.ubiquitin.ubiquitin protease	psme_t027627	(loc_os11g36470.1 : 217.0) no description available & (at5g06600 : 215.0) Encodes a ubiquitin-specific protease.; ubiquitin-specific protease 12 (UBP12); FUNCTIONS IN: ubiquitin-specific protease activity, ubiquitin thiolesterase activity; INVOLVED IN: ubiquitin-dependent protein catabolic process; LOCATED IN: cellular_component unknown; EXPRESSED IN: 25 plant structures; EXPRESSED DURING: 14 gro…
29.5.11.5	protein.degradation.ubiquitin.ubiquitin protease	psme_t028603	(loc_os11g36470.1 : 218.0) no description available & (at5g06600 : 217.0) Encodes a ubiquitin-specific protease.; ubiquitin-specific protease 12 (UBP12); FUNCTIONS IN: ubiquitin-specific protease activity, ubiquitin thiolesterase activity; INVOLVED IN: ubiquitin-dependent protein catabolic process; LOCATED IN: cellular_component unknown; EXPRESSED IN: 25 plant structures; EXPRESSED DURING: 14 gro…
29.5.11.5	protein.degradation.ubiquitin.ubiquitin protease	psme_t189185	(at5g57990 : 100.0) Encodes a ubiquitin-specific protease.; ubiquitin-specific protease 23 (UBP23); FUNCTIONS IN: ubiquitin-specific protease activity, ubiquitin thiolesterase activity; INVOLVED IN: ubiquitin-dependent protein catabolic process; LOCATED IN: chloroplast; EXPRESSED IN: 23 plant structures; EXPRESSED DURING: 13 growth stages; CONTAINS InterPro DOMAIN/s: Peptidase C19, ubiquitin carb…
29.5.2	protein.degradation.autophagy	psme_t030029	(at3g07525 : 159.0) Encodes an E1 ligase involved in autophagic vesicle formation.; autophagy 10 (ATG10); CONTAINS InterPro DOMAIN/s: Autophagy-related protein 3 (InterPro:IPR007135); Has 420 Blast hits to 420 proteins in 152 species: Archae - 0; Bacteria - 0; Metazoa - 229; Fungi - 94; Plants - 56; Viruses - 0; Other Eukaryotes - 41 (source: NCBI BLink). & (loc_os12g32210.1 : 158.0) no descripti…
29.5.3	protein.degradation.cysteine protease	psme_t104211	(at5g60360 : 100.0) Encodes a senescence-associated thiol protease.; aleurain-like protease (ALP); CONTAINS InterPro DOMAIN/s: Peptidase C1A, papain (InterPro:IPR013128), Proteinase inhibitor I29, cathepsin propeptide (InterPro:IPR013201), Peptidase C1A, papain C-terminal (InterPro:IPR000668), Peptidase, cysteine peptidase active site (InterPro:IPR000169); BEST Arabidopsis thaliana protein match …
29.5.4	protein.degradation.aspartate protease	psme_t013229	(at2g03200 : 226.0) Eukaryotic aspartyl protease family protein; FUNCTIONS IN: aspartic-type endopeptidase activity; INVOLVED IN: proteolysis; LOCATED IN: endomembrane system; EXPRESSED IN: 10 plant structures; EXPRESSED DURING: 4 anthesis, C globular stage, petal differentiation and expansion stage; CONTAINS InterPro DOMAIN/s: Peptidase aspartic (InterPro:IPR021109), Peptidase aspartic, catalyti…
29.5.4	protein.degradation.aspartate protease	psme_t020803	(at5g02190 : 347.0) encodes an aspartic protease, has an important role in determining cell fate during embryonic development and in reproduction processes. The loss-of-function mutation of PCS1 causes degeneration of both male and female gametophytes and excessive cell death of developing embryos during torpedo stage.; PROMOTION OF CELL SURVIVAL 1 (PCS1); CONTAINS InterPro DOMAIN/s: Peptidase as…
29.5.4	protein.degradation.aspartate protease	psme_t020862	(at5g10770 : 327.0) Eukaryotic aspartyl protease family protein; FUNCTIONS IN: DNA binding, aspartic-type endopeptidase activity; INVOLVED IN: proteolysis; EXPRESSED IN: 12 plant structures; EXPRESSED DURING: 4 anthesis, C globular stage, petal differentiation and expansion stage, E expanded cotyledon stage; CONTAINS InterPro DOMAIN/s: Peptidase aspartic (InterPro:IPR021109), Peptidase aspartic, …
29.5.4	protein.degradation.aspartate protease	psme_t023785	(at5g02190 : 306.0) encodes an aspartic protease, has an important role in determining cell fate during embryonic development and in reproduction processes. The loss-of-function mutation of PCS1 causes degeneration of both male and female gametophytes and excessive cell death of developing embryos during torpedo stage.; PROMOTION OF CELL SURVIVAL 1 (PCS1); CONTAINS InterPro DOMAIN/s: Peptidase as…
29.5.4	protein.degradation.aspartate protease	psme_t025471	(at5g10770 : 338.0) Eukaryotic aspartyl protease family protein; FUNCTIONS IN: DNA binding, aspartic-type endopeptidase activity; INVOLVED IN: proteolysis; EXPRESSED IN: 12 plant structures; EXPRESSED DURING: 4 anthesis, C globular stage, petal differentiation and expansion stage, E expanded cotyledon stage; CONTAINS InterPro DOMAIN/s: Peptidase aspartic (InterPro:IPR021109), Peptidase aspartic, …
29.5.4	protein.degradation.aspartate protease	psme_t027429	(at5g02190 : 203.0) encodes an aspartic protease, has an important role in determining cell fate during embryonic development and in reproduction processes. The loss-of-function mutation of PCS1 causes degeneration of both male and female gametophytes and excessive cell death of developing embryos during torpedo stage.; PROMOTION OF CELL SURVIVAL 1 (PCS1); CONTAINS InterPro DOMAIN/s: Peptidase as…
29.5.4	protein.degradation.aspartate protease	psme_t059599	(loc_os04g37550.1 : 185.0) no description available & (at2g03200 : 182.0) Eukaryotic aspartyl protease family protein; FUNCTIONS IN: aspartic-type endopeptidase activity; INVOLVED IN: proteolysis; LOCATED IN: endomembrane system; EXPRESSED IN: 10 plant structures; EXPRESSED DURING: 4 anthesis, C globular stage, petal differentiation and expansion stage; CONTAINS InterPro DOMAIN/s: Peptidase aspar…
29.5.4	protein.degradation.aspartate protease	psme_t073356	(loc_os04g37550.1 : 171.0) no description available & (at2g03200 : 165.0) Eukaryotic aspartyl protease family protein; FUNCTIONS IN: aspartic-type endopeptidase activity; INVOLVED IN: proteolysis; LOCATED IN: endomembrane system; EXPRESSED IN: 10 plant structures; EXPRESSED DURING: 4 anthesis, C globular stage, petal differentiation and expansion stage; CONTAINS InterPro DOMAIN/s: Peptidase aspar…
29.5.5	protein.degradation.serine protease	psme_t008949	(at1g11080 : 217.0) serine carboxypeptidase-like 31 (scpl31); FUNCTIONS IN: serine-type carboxypeptidase activity; INVOLVED IN: proteolysis; LOCATED IN: endomembrane system; EXPRESSED IN: 17 plant structures; EXPRESSED DURING: 4 anthesis, C globular stage, petal differentiation and expansion stage, E expanded cotyledon stage, D bilateral stage; CONTAINS InterPro DOMAIN/s: Peptidase S10, serine ca…
29.5.5	protein.degradation.serine protease	psme_t010153	(at1g61130 : 354.0) serine carboxypeptidase-like 32 (SCPL32); FUNCTIONS IN: serine-type carboxypeptidase activity; INVOLVED IN: proteolysis; LOCATED IN: endomembrane system; EXPRESSED IN: male gametophyte, root, flower; EXPRESSED DURING: 4 anthesis; CONTAINS InterPro DOMAIN/s: Peptidase S10, serine carboxypeptidase (InterPro:IPR001563), Peptidase S10, serine carboxypeptidase, active site (InterPr…
29.5.5	protein.degradation.serine protease	psme_t013596	(at1g11080 : 243.0) serine carboxypeptidase-like 31 (scpl31); FUNCTIONS IN: serine-type carboxypeptidase activity; INVOLVED IN: proteolysis; LOCATED IN: endomembrane system; EXPRESSED IN: 17 plant structures; EXPRESSED DURING: 4 anthesis, C globular stage, petal differentiation and expansion stage, E expanded cotyledon stage, D bilateral stage; CONTAINS InterPro DOMAIN/s: Peptidase S10, serine ca…
29.5.5	protein.degradation.serine protease	psme_t034463	(loc_os11g10750.1 : 381.0) no description available & (at1g43780 : 368.0) serine carboxypeptidase-like 44 (scpl44); FUNCTIONS IN: serine-type carboxypeptidase activity; INVOLVED IN: proteolysis; LOCATED IN: endomembrane system; EXPRESSED IN: 10 plant structures; EXPRESSED DURING: 4 anthesis, F mature embryo stage, petal differentiation and expansion stage, E expanded cotyledon stage; CONTAINS Int…
29.5.5	protein.degradation.serine protease	psme_t045636	(at1g15000 : 175.0) serine carboxypeptidase-like 50 (scpl50); FUNCTIONS IN: serine-type carboxypeptidase activity; INVOLVED IN: proteolysis; LOCATED IN: vacuole; EXPRESSED IN: 22 plant structures; EXPRESSED DURING: 13 growth stages; CONTAINS InterPro DOMAIN/s: Peptidase S10, serine carboxypeptidase (InterPro:IPR001563), Peptidase S10, serine carboxypeptidase, active site (InterPro:IPR018202); BES…
29.5.5	protein.degradation.serine protease	psme_t160518	(at1g11080 : 198.0) serine carboxypeptidase-like 31 (scpl31); FUNCTIONS IN: serine-type carboxypeptidase activity; INVOLVED IN: proteolysis; LOCATED IN: endomembrane system; EXPRESSED IN: 17 plant structures; EXPRESSED DURING: 4 anthesis, C globular stage, petal differentiation and expansion stage, E expanded cotyledon stage, D bilateral stage; CONTAINS InterPro DOMAIN/s: Peptidase S10, serine ca…
29.5.7	protein.degradation.metalloprotease	psme_t003264	(at1g06430 : 125.0) encodes a FtsH protease that is localized to the chloroplast; FTSH protease 8 (FTSH8); FUNCTIONS IN: metallopeptidase activity, ATP-dependent peptidase activity, ATPase activity, zinc ion binding; INVOLVED IN: PSII associated light-harvesting complex II catabolic process; LOCATED IN: thylakoid, chloroplast thylakoid membrane, chloroplast, membrane, chloroplast envelope; EXPRES…
29.5.7	protein.degradation.metalloprotease	psme_t093242	(at2g41790 : 230.0) Insulinase (Peptidase family M16) family protein; FUNCTIONS IN: metalloendopeptidase activity, zinc ion binding, catalytic activity, metal ion binding; INVOLVED IN: proteolysis; LOCATED IN: cellular_component unknown; EXPRESSED IN: 23 plant structures; EXPRESSED DURING: 13 growth stages; CONTAINS InterPro DOMAIN/s: Peptidase M16, zinc-binding site (InterPro:IPR001431), Peptida…

## Sheet: Bin 11 Lip Metabol
Bin Code	Bin Name	Sequence Name	Description from Mercator Mapping
11.6	lipid metabolism.lipid transfer proteins etc	psme_t039624	(loc_os02g03230.1 : 199.0) no description available & (at1g64720 : 191.0) membrane related protein CP5; CP5; FUNCTIONS IN: molecular_function unknown; INVOLVED IN: biological_process unknown; LOCATED IN: vacuole; EXPRESSED IN: 23 plant structures; EXPRESSED DURING: 15 growth stages; CONTAINS InterPro DOMAIN/s: Lipid-binding START (InterPro:IPR002913); BEST Arabidopsis thaliana protein match is: P…
11.1.10	lipid metabolism.FA synthesis and FA elongation.beta ketoacyl CoA synthase	psme_t009904	(loc_os02g11070.1 : 611.0) no description available & (at2g26640 : 583.0) Encodes KCS11, a member of the 3-ketoacyl-CoA synthase family involved in the biosynthesis of VLCFA (very long chain fatty acids).; 3-ketoacyl-CoA synthase 11 (KCS11); FUNCTIONS IN: transferase activity, transferring acyl groups other than amino-acyl groups, catalytic activity; INVOLVED IN: response to cold, response to lig…
11.1.10	lipid metabolism.FA synthesis and FA elongation.beta ketoacyl CoA synthase	psme_t020775	(at1g25450 : 474.0) Encodes KCS5, a member of the 3-ketoacyl-CoA synthase family involved in the biosynthesis of VLCFA (very long chain fatty acids).; 3-ketoacyl-CoA synthase 5 (KCS5); FUNCTIONS IN: fatty acid elongase activity; INVOLVED IN: in 6 processes; LOCATED IN: endoplasmic reticulum, membrane; EXPRESSED IN: 22 plant structures; EXPRESSED DURING: 13 growth stages; CONTAINS InterPro DOMAIN/…
11.1.10	lipid metabolism.FA synthesis and FA elongation.beta ketoacyl CoA synthase	psme_t026991	(at2g16280 : 392.0) Encodes KCS9, a member of the 3-ketoacyl-CoA synthase family involved in the biosynthesis of VLCFA (very long chain fatty acids).; 3-ketoacyl-CoA synthase 9 (KCS9); FUNCTIONS IN: transferase activity, transferring acyl groups other than amino-acyl groups, catalytic activity; INVOLVED IN: response to cold, response to light stimulus, very long-chain fatty acid metabolic process…
11.1.11	lipid metabolism.FA synthesis and FA elongation.fatty acid elongase	psme_t009904	(loc_os02g11070.1 : 611.0) no description available & (at2g26640 : 583.0) Encodes KCS11, a member of the 3-ketoacyl-CoA synthase family involved in the biosynthesis of VLCFA (very long chain fatty acids).; 3-ketoacyl-CoA synthase 11 (KCS11); FUNCTIONS IN: transferase activity, transferring acyl groups other than amino-acyl groups, catalytic activity; INVOLVED IN: response to cold, response to lig…
11.1.11	lipid metabolism.FA synthesis and FA elongation.fatty acid elongase	psme_t020775	(at1g25450 : 474.0) Encodes KCS5, a member of the 3-ketoacyl-CoA synthase family involved in the biosynthesis of VLCFA (very long chain fatty acids).; 3-ketoacyl-CoA synthase 5 (KCS5); FUNCTIONS IN: fatty acid elongase activity; INVOLVED IN: in 6 processes; LOCATED IN: endoplasmic reticulum, membrane; EXPRESSED IN: 22 plant structures; EXPRESSED DURING: 13 growth stages; CONTAINS InterPro DOMAIN/…
11.1.11	lipid metabolism.FA synthesis and FA elongation.fatty acid elongase	psme_t026991	(at2g16280 : 392.0) Encodes KCS9, a member of the 3-ketoacyl-CoA synthase family involved in the biosynthesis of VLCFA (very long chain fatty acids).; 3-ketoacyl-CoA synthase 9 (KCS9); FUNCTIONS IN: transferase activity, transferring acyl groups other than amino-acyl groups, catalytic activity; INVOLVED IN: response to cold, response to light stimulus, very long-chain fatty acid metabolic process…
11.1.13	lipid metabolism.FA synthesis and FA elongation.acyl-CoA binding protein	psme_t007595	(chl4|511950 : 139.0) no description available & (loc_os01g19480.1 : 113.0) no description available & (at1g18610 : 91.7) Galactose oxidase/kelch repeat superfamily protein; CONTAINS InterPro DOMAIN/s: Galactose oxidase/kelch, beta-propeller (InterPro:IPR011043), Kelch repeat type 1 (InterPro:IPR006652), Kelch repeat type 2 (InterPro:IPR011498), Kelch-type beta propeller (InterPro:IPR015915); BES…
11.1.15	lipid metabolism.FA synthesis and FA elongation.ACP desaturase	psme_t103834	(p22337|stad_ricco : 234.0) Acyl-[acyl-carrier-protein] desaturase, chloroplast precursor (EC 1.14.19.2) (Stearoyl-ACP desaturase) (Delta(9) stearoyl-acyl carrier protein desaturase) - Ricinus communis (Castor bean) & (loc_os04g31070.1 : 234.0) no description available & (at2g43710 : 225.0) Encodes a stearoyl-ACP desaturase, involved in fatty acid desaturation. The ssi2 mutants have increased 18:…
11.1.3	lipid metabolism.FA synthesis and FA elongation.ketoacyl ACP synthase	psme_t004849	(at5g46290 : 525.0) 3-ketoacyl-acyl carrier protein synthase I (KAS I) mRNA,; 3-ketoacyl-acyl carrier protein synthase I (KAS I); FUNCTIONS IN: transferase activity, transferring acyl groups other than amino-acyl groups, fatty acid synthase activity, catalytic activity; INVOLVED IN: biosynthetic process, metabolic process, fatty acid biosynthetic process; EXPRESSED IN: 23 plant structures; EXPRES…
11.1.3	lipid metabolism.FA synthesis and FA elongation.ketoacyl ACP synthase	psme_t009523	(at5g46290 : 201.0) 3-ketoacyl-acyl carrier protein synthase I (KAS I) mRNA,; 3-ketoacyl-acyl carrier protein synthase I (KAS I); FUNCTIONS IN: transferase activity, transferring acyl groups other than amino-acyl groups, fatty acid synthase activity, catalytic activity; INVOLVED IN: biosynthetic process, metabolic process, fatty acid biosynthetic process; EXPRESSED IN: 23 plant structures; EXPRES…
11.1.3	lipid metabolism.FA synthesis and FA elongation.ketoacyl ACP synthase	psme_t016617	(at5g46290 : 228.0) 3-ketoacyl-acyl carrier protein synthase I (KAS I) mRNA,; 3-ketoacyl-acyl carrier protein synthase I (KAS I); FUNCTIONS IN: transferase activity, transferring acyl groups other than amino-acyl groups, fatty acid synthase activity, catalytic activity; INVOLVED IN: biosynthetic process, metabolic process, fatty acid biosynthetic process; EXPRESSED IN: 23 plant structures; EXPRES…
11.1.3	lipid metabolism.FA synthesis and FA elongation.ketoacyl ACP synthase	psme_t018709	(loc_os06g09630.1 : 656.0) no description available & (at5g46290 : 649.0) 3-ketoacyl-acyl carrier protein synthase I (KAS I) mRNA,; 3-ketoacyl-acyl carrier protein synthase I (KAS I); FUNCTIONS IN: transferase activity, transferring acyl groups other than amino-acyl groups, fatty acid synthase activity, catalytic activity; INVOLVED IN: biosynthetic process, metabolic process, fatty acid biosynthe…
11.1.8	lipid metabolism.FA synthesis and FA elongation.acyl coa ligase	psme_t039962	(at3g48990 : 481.0) AMP-dependent synthetase and ligase family protein; FUNCTIONS IN: catalytic activity, AMP binding; INVOLVED IN: response to cadmium ion; LOCATED IN: apoplast, chloroplast; EXPRESSED IN: 26 plant structures; EXPRESSED DURING: 15 growth stages; CONTAINS InterPro DOMAIN/s: AMP-binding, conserved site (InterPro:IPR020845), AMP-dependent synthetase/ligase (InterPro:IPR000873); BEST…
11.1.8	lipid metabolism.FA synthesis and FA elongation.acyl coa ligase	psme_t058778	(at5g16370 : 268.0) acyl activating enzyme 5 (AAE5); FUNCTIONS IN: catalytic activity; INVOLVED IN: metabolic process; LOCATED IN: peroxisome; EXPRESSED IN: leaf; CONTAINS InterPro DOMAIN/s: AMP-binding, conserved site (InterPro:IPR020845), AMP-dependent synthetase/ligase (InterPro:IPR000873); BEST Arabidopsis thaliana protein match is: AMP-dependent synthetase and ligase family protein (TAIR:AT5…
11.1.8	lipid metabolism.FA synthesis and FA elongation.acyl coa ligase	psme_t109026	(at1g20560 : 223.0) acyl activating enzyme 1 (AAE1); FUNCTIONS IN: AMP binding; INVOLVED IN: metabolic process; LOCATED IN: peroxisome; EXPRESSED IN: 22 plant structures; EXPRESSED DURING: 13 growth stages; CONTAINS InterPro DOMAIN/s: AMP-binding, conserved site (InterPro:IPR020845), AMP-dependent synthetase/ligase (InterPro:IPR000873); BEST Arabidopsis thaliana protein match is: AMP-dependent sy…
11.1.8	lipid metabolism.FA synthesis and FA elongation.acyl coa ligase	psme_t169177	(at1g20560 : 100.0) acyl activating enzyme 1 (AAE1); FUNCTIONS IN: AMP binding; INVOLVED IN: metabolic process; LOCATED IN: peroxisome; EXPRESSED IN: 22 plant structures; EXPRESSED DURING: 13 growth stages; CONTAINS InterPro DOMAIN/s: AMP-binding, conserved site (InterPro:IPR020845), AMP-dependent synthetase/ligase (InterPro:IPR000873); BEST Arabidopsis thaliana protein match is: AMP-dependent sy…
11.10.1	lipid metabolism.glycolipid synthesis.MGDG synthase	psme_t018103	(at4g31780 : 527.0) Encodes an A-type monogalactosyldiacylglycerol (MGDG) synthase. It represents the isoform responsible for the bulk of MGDG synthesis in Arabidopsis.; monogalactosyl diacylglycerol synthase 1 (MGD1); FUNCTIONS IN: UDP-glycosyltransferase activity, 1,2-diacylglycerol 3-beta-galactosyltransferase activity, transferase activity, transferring glycosyl groups, UDP-galactosyltransfer…
11.10.1	lipid metabolism.glycolipid synthesis.MGDG synthase	psme_t018462	(at4g31780 : 586.0) Encodes an A-type monogalactosyldiacylglycerol (MGDG) synthase. It represents the isoform responsible for the bulk of MGDG synthesis in Arabidopsis.; monogalactosyl diacylglycerol synthase 1 (MGD1); FUNCTIONS IN: UDP-glycosyltransferase activity, 1,2-diacylglycerol 3-beta-galactosyltransferase activity, transferase activity, transferring glycosyl groups, UDP-galactosyltransfer…
11.5.2	lipid metabolism.glyceral metabolism.Glycerol-3-phosphate dehydrogenase (NAD+)	psme_t019415	(at2g40690 : 514.0) Encodes a putative dihydroxyacetone phosphate (DHAP) reductase involved in glycerol-3-phosphate supply within the chloroplast for synthesis of glycerolipids. Mutants have reduced levels of hexadecatrienoic acid, which is rescued by exogenous glycerol-3-phosphate. This gene appears to be involved in the flux of fatty acids in the prokaryotic glyerolipid biosynthesis pathway.; G…
11.5.2	lipid metabolism.glyceral metabolism.Glycerol-3-phosphate dehydrogenase (NAD+)	psme_t047654	(loc_os01g71280.1 : 252.0) no description available & (at2g41540 : 244.0) Encodes a protein with NAD-dependent glycerol-3-phosphate (G3P) dehydrogenase which was shown to complement an Escherichia coli strain: BB20-14, auxotrophic for glycerol/G3P due to a loss-of-function mutation in the gpsA gene.; GPDHC1; CONTAINS InterPro DOMAIN/s: 6-phosphogluconate dehydrogenase, C-terminal-like (InterPro:I…
11.8.1	lipid metabolism.'exotics' (steroids, squalene etc).sphingolipids	psme_t023477	(loc_os02g42660.1 : 450.0) no description available & (at4g04930 : 437.0) Encodes a sphingolipid delta4-desaturase, involved in sphingolipid biosynthesis. Specifically expressed in floral tissues. Knockout mutants were devoid of sphinga-4,8-dienine in floral tissues.; DES-1-LIKE; FUNCTIONS IN: oxidoreductase activity, sphingolipid delta-4 desaturase activity; INVOLVED IN: sphingolipid biosyntheti…
11.8.1	lipid metabolism.'exotics' (steroids, squalene etc).sphingolipids	psme_t032803	(loc_os03g49480.1 : 107.0) no description available & (at4g36830 : 102.0) HOS3-1; FUNCTIONS IN: molecular_function unknown; INVOLVED IN: biological_process unknown; LOCATED IN: integral to membrane; EXPRESSED IN: 13 plant structures; EXPRESSED DURING: 7 growth stages; CONTAINS InterPro DOMAIN/s: GNS1/SUR4 membrane protein (InterPro:IPR002076); BEST Arabidopsis thaliana protein match is: GNS1/SUR4…
11.8.1	lipid metabolism.'exotics' (steroids, squalene etc).sphingolipids	psme_t054953	(at3g25540 : 119.0) LAG1 homolog 1; LONGEVITY ASSURANCE GENE 1 (LAG1); FUNCTIONS IN: molecular_function unknown; INVOLVED IN: N-terminal protein myristoylation; LOCATED IN: Golgi apparatus, endoplasmic reticulum, plasma membrane; EXPRESSED IN: 22 plant structures; EXPRESSED DURING: 13 growth stages; CONTAINS InterPro DOMAIN/s: Longevity assurance, LAG1/LAC1 (InterPro:IPR016439), TRAM/LAG1/CLN8 ho…
11.9.2.1	lipid metabolism.lipid degradation.lipases.triacylglycerol lipase	psme_t002922	(at3g07400 : 388.0) lipase class 3 family protein; FUNCTIONS IN: triglyceride lipase activity; INVOLVED IN: lipid metabolic process; LOCATED IN: cellular_component unknown; EXPRESSED IN: 24 plant structures; EXPRESSED DURING: 15 growth stages; CONTAINS InterPro DOMAIN/s: Lipase, class 3 (InterPro:IPR002921); Has 393 Blast hits to 389 proteins in 69 species: Archae - 0; Bacteria - 12; Metazoa - 12…
11.9.2.1	lipid metabolism.lipid degradation.lipases.triacylglycerol lipase	psme_t006931	(at1g06800 : 337.0) Encodes a lipase that hydrolyzes phosphatidylcholine, glycolipids as well as triacylglycerols.; alpha/beta-Hydrolases superfamily protein; FUNCTIONS IN: galactolipase activity, triglyceride lipase activity, phospholipase A1 activity; INVOLVED IN: lipid metabolic process; LOCATED IN: chloroplast; EXPRESSED IN: 8 plant structures; EXPRESSED DURING: 4 anthesis, C globular stage, …
11.9.2.1	lipid metabolism.lipid degradation.lipases.triacylglycerol lipase	psme_t027026	(at1g06800 : 377.0) Encodes a lipase that hydrolyzes phosphatidylcholine, glycolipids as well as triacylglycerols.; alpha/beta-Hydrolases superfamily protein; FUNCTIONS IN: galactolipase activity, triglyceride lipase activity, phospholipase A1 activity; INVOLVED IN: lipid metabolic process; LOCATED IN: chloroplast; EXPRESSED IN: 8 plant structures; EXPRESSED DURING: 4 anthesis, C globular stage, …
11.9.2.1	lipid metabolism.lipid degradation.lipases.triacylglycerol lipase	psme_t028203	(at1g06800 : 309.0) Encodes a lipase that hydrolyzes phosphatidylcholine, glycolipids as well as triacylglycerols.; alpha/beta-Hydrolases superfamily protein; FUNCTIONS IN: galactolipase activity, triglyceride lipase activity, phospholipase A1 activity; INVOLVED IN: lipid metabolic process; LOCATED IN: chloroplast; EXPRESSED IN: 8 plant structures; EXPRESSED DURING: 4 anthesis, C globular stage, …
11.9.2.1	lipid metabolism.lipid degradation.lipases.triacylglycerol lipase	psme_t067148	(at1g06800 : 181.0) Encodes a lipase that hydrolyzes phosphatidylcholine, glycolipids as well as triacylglycerols.; alpha/beta-Hydrolases superfamily protein; FUNCTIONS IN: galactolipase activity, triglyceride lipase activity, phospholipase A1 activity; INVOLVED IN: lipid metabolic process; LOCATED IN: chloroplast; EXPRESSED IN: 8 plant structures; EXPRESSED DURING: 4 anthesis, C globular stage, …
11.9.3	lipid metabolism.lipid degradation.lysophospholipases	psme_t077022	(at4g38690 : 202.0) PLC-like phosphodiesterases superfamily protein; FUNCTIONS IN: phospholipase C activity, phosphoric diester hydrolase activity; INVOLVED IN: intracellular signaling pathway, N-terminal protein myristoylation, lipid metabolic process; LOCATED IN: cellular_component unknown; EXPRESSED IN: 23 plant structures; EXPRESSED DURING: 12 growth stages; CONTAINS InterPro DOMAIN/s: Phosph…
11.9.3	lipid metabolism.lipid degradation.lysophospholipases	psme_t108343	(loc_os01g72520.1 : 130.0) no description available & (at2g26870 : 125.0) non-specific phospholipase C2 (NPC2); FUNCTIONS IN: hydrolase activity, acting on ester bonds; INVOLVED IN: triglyceride biosynthetic process, phospholipid biosynthetic process; LOCATED IN: endomembrane system; EXPRESSED IN: 17 plant structures; EXPRESSED DURING: 12 growth stages; CONTAINS InterPro DOMAIN/s: Phosphoesterase…
11.9.3.1	lipid metabolism.lipid degradation.lysophospholipases.phospholipase D	psme_t008404	(q41142|plda1_ricco : 995.0) Phospholipase D alpha 1 precursor (EC 3.1.4.4) (PLD 1) (Choline phosphatase 1) (Phosphatidylcholine-hydrolyzing phospholipase D 1) - Ricinus communis (Castor bean) & (loc_os01g07760.2 : 984.0) no description available & (at3g15730 : 959.0) Encodes phospholipase D alpha 1 (PLD alpha 1). Positive regulator of abscisic acid (ABA) mediated stomatal movements. PLD alpha 1 …
11.9.3.3	lipid metabolism.lipid degradation.lysophospholipases.glycerophosphodiester phosphodiesterase	psme_t011699	(loc_os08g42390.1 : 129.0) no description available & (at5g41080 : 121.0) PLC-like phosphodiesterases superfamily protein; FUNCTIONS IN: phosphoric diester hydrolase activity, glycerophosphodiester phosphodiesterase activity; INVOLVED IN: glycerol metabolic process, lipid metabolic process; EXPRESSED IN: 23 plant structures; EXPRESSED DURING: 14 growth stages; CONTAINS InterPro DOMAIN/s: PLC-like…
11.9.3.3	lipid metabolism.lipid degradation.lysophospholipases.glycerophosphodiester phosphodiesterase	psme_t012622	(loc_os01g49200.1 : 132.0) no description available & (at3g02040 : 119.0) senescence-related gene 3 (SRG3); FUNCTIONS IN: phosphoric diester hydrolase activity, glycerophosphodiester phosphodiesterase activity; INVOLVED IN: glycerol metabolic process, lipid metabolic process; EXPRESSED IN: 18 plant structures; EXPRESSED DURING: 8 growth stages; CONTAINS InterPro DOMAIN/s: PLC-like phosphodiestera…
11.9.3.3	lipid metabolism.lipid degradation.lysophospholipases.glycerophosphodiester phosphodiesterase	psme_t013571	(at1g67000 : 317.0) Protein kinase superfamily protein; FUNCTIONS IN: protein serine/threonine kinase activity, protein kinase activity, kinase activity, ATP binding; INVOLVED IN: protein amino acid phosphorylation; LOCATED IN: endomembrane system; EXPRESSED IN: stem; CONTAINS InterPro DOMAIN/s: Protein kinase, ATP binding site (InterPro:IPR017441), Protein kinase, catalytic domain (InterPro:IPR0…
11.9.3.3	lipid metabolism.lipid degradation.lysophospholipases.glycerophosphodiester phosphodiesterase	psme_t013625	(at3g02040 : 221.0) senescence-related gene 3 (SRG3); FUNCTIONS IN: phosphoric diester hydrolase activity, glycerophosphodiester phosphodiesterase activity; INVOLVED IN: glycerol metabolic process, lipid metabolic process; EXPRESSED IN: 18 plant structures; EXPRESSED DURING: 8 growth stages; CONTAINS InterPro DOMAIN/s: PLC-like phosphodiesterase, TIM beta/alpha-barrel domain (InterPro:IPR017946),…
11.9.3.3	lipid metabolism.lipid degradation.lysophospholipases.glycerophosphodiester phosphodiesterase	psme_t013869	(at5g41080 : 194.0) PLC-like phosphodiesterases superfamily protein; FUNCTIONS IN: phosphoric diester hydrolase activity, glycerophosphodiester phosphodiesterase activity; INVOLVED IN: glycerol metabolic process, lipid metabolic process; EXPRESSED IN: 23 plant structures; EXPRESSED DURING: 14 growth stages; CONTAINS InterPro DOMAIN/s: PLC-like phosphodiesterase, TIM beta/alpha-barrel domain (Inte…
11.9.3.3	lipid metabolism.lipid degradation.lysophospholipases.glycerophosphodiester phosphodiesterase	psme_t024845	(at3g02040 : 207.0) senescence-related gene 3 (SRG3); FUNCTIONS IN: phosphoric diester hydrolase activity, glycerophosphodiester phosphodiesterase activity; INVOLVED IN: glycerol metabolic process, lipid metabolic process; EXPRESSED IN: 18 plant structures; EXPRESSED DURING: 8 growth stages; CONTAINS InterPro DOMAIN/s: PLC-like phosphodiesterase, TIM beta/alpha-barrel domain (InterPro:IPR017946),…
11.9.3.3	lipid metabolism.lipid degradation.lysophospholipases.glycerophosphodiester phosphodiesterase	psme_t025895	(at1g71340 : 320.0) PLC-like phosphodiesterases superfamily protein; FUNCTIONS IN: phosphoric diester hydrolase activity, glycerophosphodiester phosphodiesterase activity; INVOLVED IN: glycerol metabolic process, lipid metabolic process; LOCATED IN: cellular_component unknown; EXPRESSED IN: 23 plant structures; EXPRESSED DURING: 13 growth stages; CONTAINS InterPro DOMAIN/s: PLC-like phosphodieste…
11.9.3.3	lipid metabolism.lipid degradation.lysophospholipases.glycerophosphodiester phosphodiesterase	psme_t026653	(at5g38240 : 179.0) Protein kinase family protein; FUNCTIONS IN: protein serine/threonine kinase activity, protein kinase activity, kinase activity, ATP binding; INVOLVED IN: protein amino acid phosphorylation; LOCATED IN: endomembrane system; CONTAINS InterPro DOMAIN/s: Protein kinase, ATP binding site (InterPro:IPR017441), Serine/threonine-protein kinase domain (InterPro:IPR002290), Serine-thre…
11.9.3.3	lipid metabolism.lipid degradation.lysophospholipases.glycerophosphodiester phosphodiesterase	psme_t048466	(at5g38250 : 165.0) Protein kinase family protein; FUNCTIONS IN: protein serine/threonine kinase activity, protein kinase activity, kinase activity, ATP binding; INVOLVED IN: protein amino acid phosphorylation; LOCATED IN: endomembrane system; CONTAINS InterPro DOMAIN/s: Protein kinase, catalytic domain (InterPro:IPR000719), Serine/threonine-protein kinase domain (InterPro:IPR002290), Serine-thre…
11.9.3.3	lipid metabolism.lipid degradation.lysophospholipases.glycerophosphodiester phosphodiesterase	psme_t143650	(loc_os01g02750.1 : 98.2) no description available & (at4g18250 : 92.8) receptor serine/threonine kinase, putative; FUNCTIONS IN: transmembrane receptor protein serine/threonine kinase activity, kinase activity; INVOLVED IN: protein amino acid phosphorylation; EXPRESSED IN: 8 plant structures; EXPRESSED DURING: LP.06 six leaves visible, LP.04 four leaves visible, LP.10 ten leaves visible, LP.02 t…
11.9.3.4	lipid metabolism.lipid degradation.lysophospholipases.phospholipase A2	psme_t039236	(at2g06925 : 124.0) Encodes a secretory phospholipase A2 enzyme, which specifically hydrolyzes the sn-2 position of phospholipids. The enzyme has a preference towards linoleoyl acyl chain over palmitoyl acyl chain. It also has a slight preference for phosphatidylcholine over phosphatidylethanolamine.; PLA2-ALPHA; FUNCTIONS IN: phospholipase A2 activity; INVOLVED IN: phospholipid metabolic process…
11.9.4.2	lipid metabolism.lipid degradation.beta-oxidation.acyl CoA DH	psme_t165868	(at1g06310 : 167.0) Encodes a putative acyl-CoA oxidase. However, no transcripts have been detected for this gene and no altered phenotypes have been detected in plants mutant for this gene. This suggests that ACX6 does not significantly contribute to seedling beta-oxidation of fatty acids or indole-3-butyric acid in vivo.; acyl-CoA oxidase 6 (ACX6); FUNCTIONS IN: acyl-CoA dehydrogenase activity,…
11.9.4.5	lipid metabolism.lipid degradation.beta-oxidation.acyl-CoA thioesterase	psme_t030748	(at2g29590 : 99.8) Thioesterase superfamily protein; CONTAINS InterPro DOMAIN/s: Thioesterase superfamily (InterPro:IPR006683); BEST Arabidopsis thaliana protein match is: Thioesterase superfamily protein (TAIR:AT1G04290.1); Has 283 Blast hits to 282 proteins in 58 species: Archae - 0; Bacteria - 0; Metazoa - 92; Fungi - 21; Plants - 166; Viruses - 0; Other Eukaryotes - 4 (source: NCBI BLink). & …
